# Supplementary material for: Versatile photocatalytic activities of indenoquinoxalines for dye reduction, single-crystal nucleation, and MNP formation with iron scrap under sunlight
Source: Royal Society of Chemistry journal article supplement (doi:10.1039/d4ra04808c), 2024-01-01
Supplement: d4ra04808c1.pdf [file d4ra04808c1.pdf]

## Versatile photocatalytic activities of indenoquinoxalines for dye reduction, single crystal nucleation, and MNPs formation with Iron scrap under sunlight

Renu Kumari and Man Singh\*

E-mail: [renukumaribalot6@gmail.com](mailto:renukumaribalot6@gmail.com) , \*E-mail: [mansingh50@hotmail.com](mailto:mansingh50@hotmail.com) .

School of Chemical Sciences, Central University of Gujarat, Gandhinagar, 382030, India.

\*Corresponding author: Tel: +91-079-23260210; Fax: +91-079-23260076

### Table of Contents

1. General information.....S1
2. Experimental procedures and compound characterization .....S1

### I. General Information

All the reagents were purchased from Sigma Aldrich. Structures were analyzed with  $^1\text{H}$ ,  $^{13}\text{C}$  NMR, FT-IR, LC-MS, XRD, UV-Vis, HR-TEM, SEM, fluorescent spectroscopy, TGA, Raman spectroscopy, and elemental study were characterized.

### 2. Experimental procedures and compound characterization

**Scheme S1.** Synthesis of 11H-indeno[1,2-b]quinoxalin-11-one (IQ).

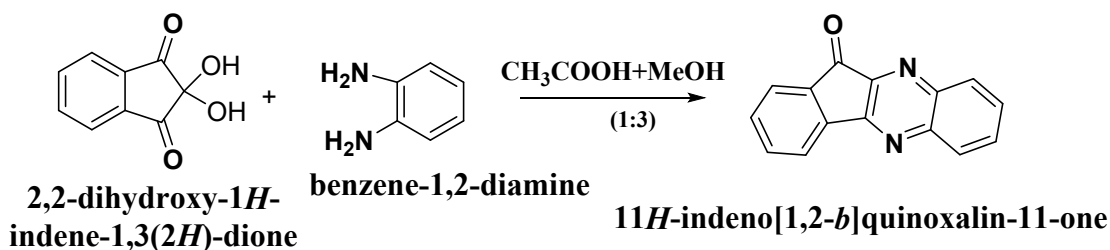

**Table S1.** Synthesis of IQ (Scheme S1).

| Chemical Name       | Mol. wt. (g) | mmol | Quantity(g) | Equivalent |
|---------------------|--------------|------|-------------|------------|
| benzene-1,2-diamine | 108.1        | 11   | 1.1         | 1.1 eq     |
| Ninhydrin           | 178.1        | 10   | 1.8         | 1.0 eq     |
| Acetic acid         | 60.0         |      | 10.0 mL     |            |
| Methanol            |              |      | 30.0 mL     |            |

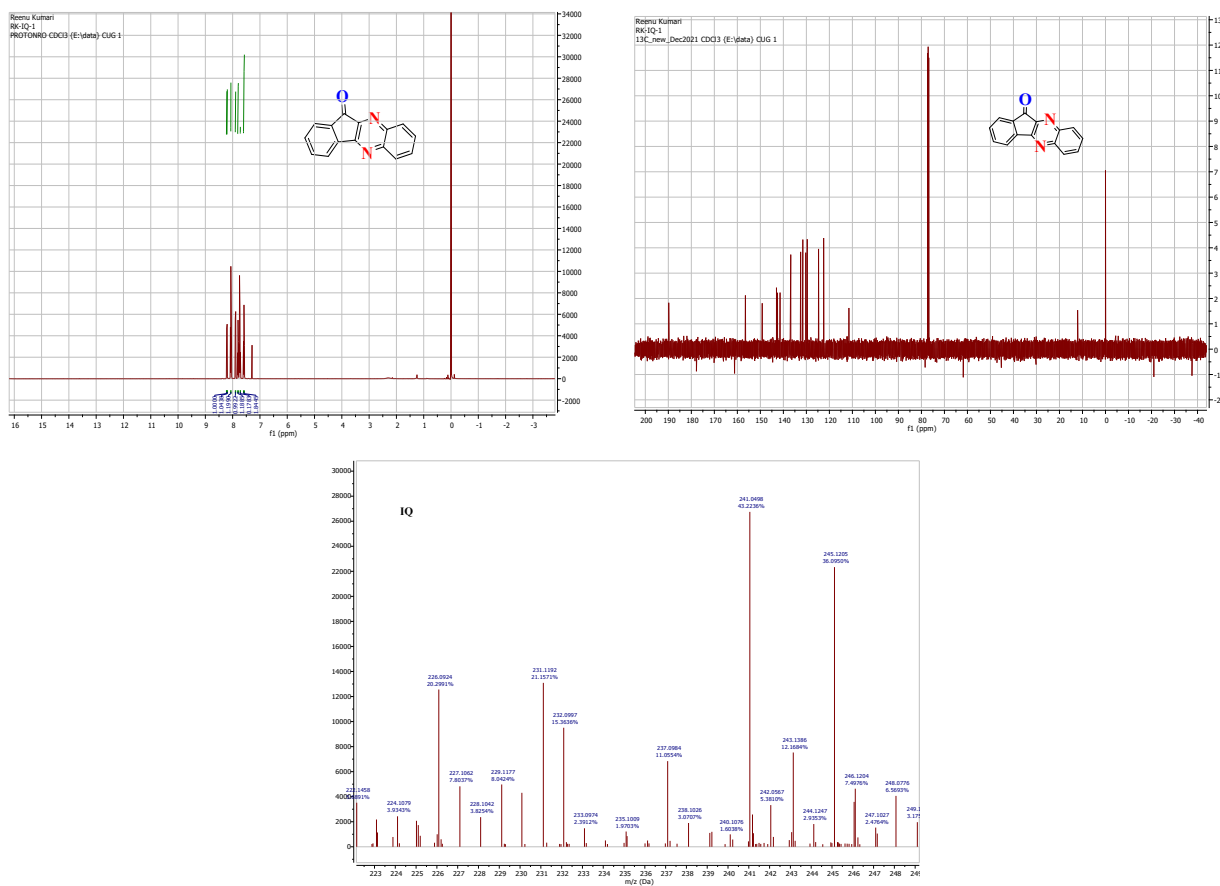

**Fig S1.**  $^1\text{H}$ ,  $^{13}\text{C}$  NMR, and mass spectra for IQ (Scheme S1).

**Light yellow solid, yield (91%),  $^1\text{H}$  NMR 500 MHz ( $\text{CDCl}_3$ )  $\delta$  ppm:** 8.21 (d, 1H,  $J=1.5$  Hz), 8.20 (d, 1H,  $J=1.5$  Hz), 8.06 (t, 1H,  $J=15$  Hz), 7.89 (d, 1H,  $J=7.5$ Hz), 7.80 (t, 1H,  $J=14$  Hz), 7.7 (d, 1H,  $J=1.75$  Hz), 7.58 (t, 2H,  $J=7.5$  Hz).  $^{13}\text{C}$  NMR 125 MHz ( $\text{CDCl}_3$ )  $\delta$  (ppm): 189.8, 156.3, 149.2, 143.0, 142.5, 141.4, 136.8, 136.6, 132.5, 132.4, 131.5, 130.3, 124.7, 122.5, and 111.5. Mass analysis:  $m/z=232.0$  (**Fig S1**).

**Scheme S2.** Synthesis of 7-nitro-11H-indeno[1,2-b] quinoxalin-11-one (NIQ) [1].

-dihydroxy-1*H*-ne-1,3(2*H*)-dione      4-nitrobenzene-1,2-diamine      7-nitro-11*H*-indeno[1,2-*b*]quinoxalin-11-one

**Table S2.** Synthesis of NIQ (Scheme S2) [1].

| Chemical Name                | Mol. wt. (g) | mmol | Quantity(g) | Equivalent |
|------------------------------|--------------|------|-------------|------------|
| 4-nitrophenylene-1,2-diamine | 153.1        | 11   | 1.7         | 1.1 eq     |
| Ninhydrin                    | 178.1        | 10   | 1.8         | 1.0 eq     |
| Acetic acid                  | 60.0         |      | 10.0 mL     |            |
| Methanol                     |              |      | 30.0 mL     |            |

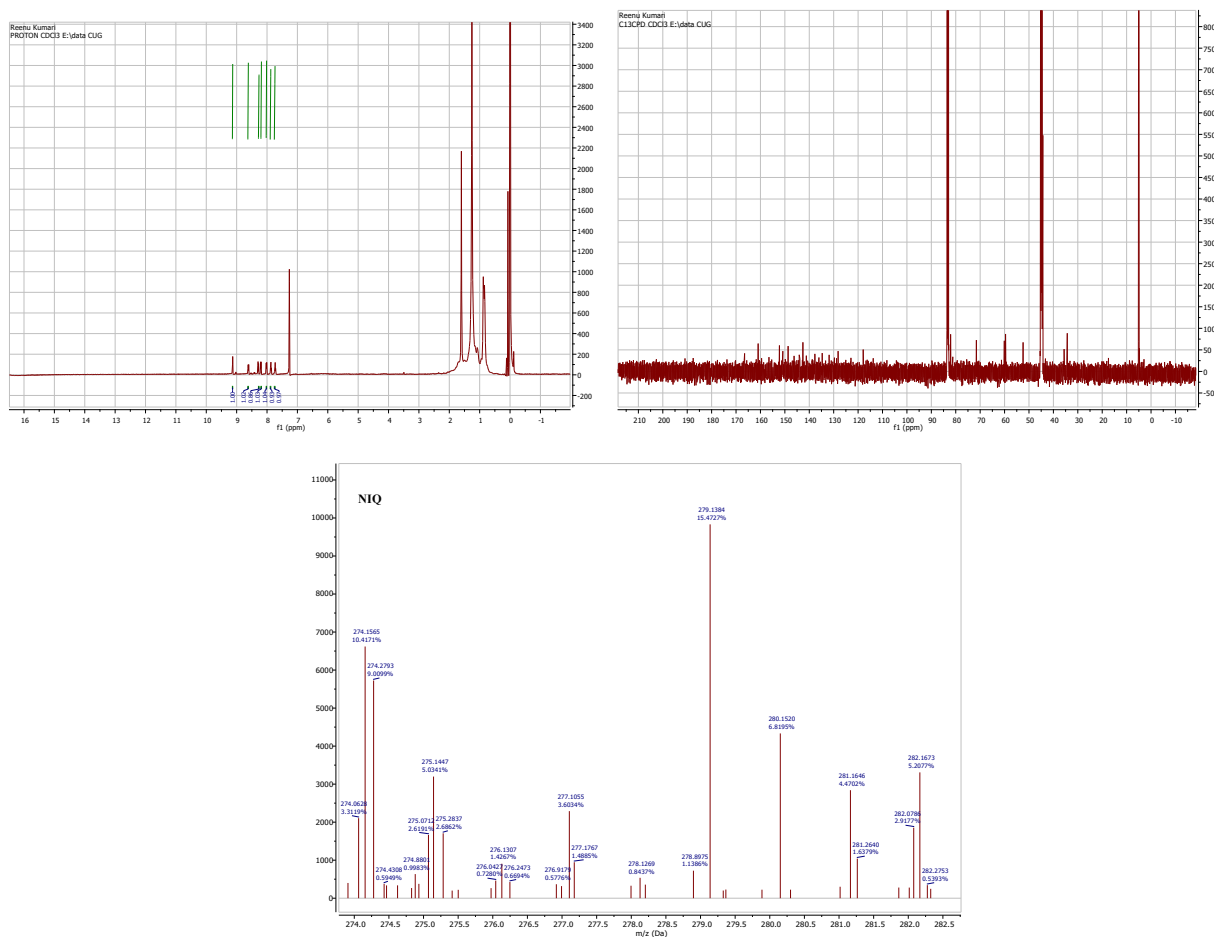

**Fig S2.** <sup>1</sup>H, <sup>13</sup>C NMR from our previously reported NIQ study [1] validated with mass spectra.

**Pale yellow powder yield: 97%, <sup>1</sup>H NMR 500 MHz (CDCl<sub>3</sub>) δ ppm:** Aromatic protons 9.13 (s, 1H), 8.61 (d, 1H, *J*=9.46 Hz), 8.29 (d, 1H, *J*=9.00 Hz), 8.20 (d, 1H, *J*=7.50 Hz), 8.02 (d, 1H, *J*=7.41 Hz), 7.87 (t, 1H, *J*=7.28 Hz), 7.73 (t, 1H, *J*=7.41 Hz). **<sup>13</sup>C NMR 125 MHz (CDCl<sub>3</sub>) δ (ppm):** 156.2, 145.1, 145.9, 139.8, 136.4, 134, 130.9, 129.2, 128.2, 125.2, 124.5, 123.8, 123.7, and 77.2. Mass analysis: *m/z*= 277.1 (**Fig S2**).

**Scheme S3.** Synthesis of 7-chloro-11H-indeno[1,2-*b*]quinoxalin-11-one (CIQ).

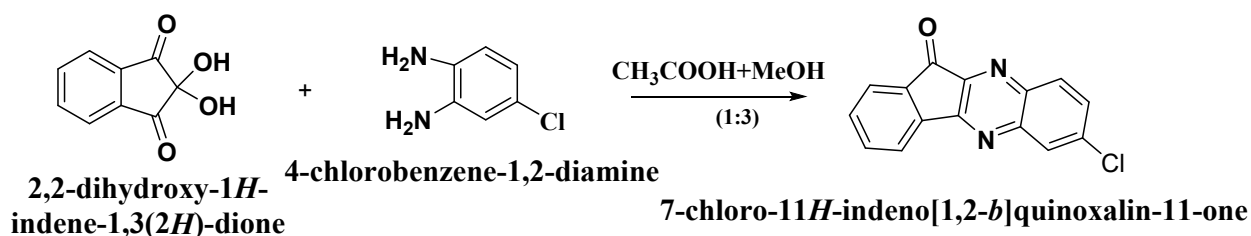

**Table S3.** Synthesis of CIQ (Scheme S3).

| Chemical Name                | Mol. wt. (g) | mmol | Quantity(g) | Equivalent |
|------------------------------|--------------|------|-------------|------------|
| 4-nitrophenylene-1,2-diamine | 142.6        | 11   | 1.5         | 1.1 eq     |
| Ninhydrin                    | 178.1        | 10   | 1.8         | 1.0 eq     |
| Acetic acid                  | 60.0         |      | 10.0 mL     |            |
| Methanol                     |              |      | 30.0 mL     |            |

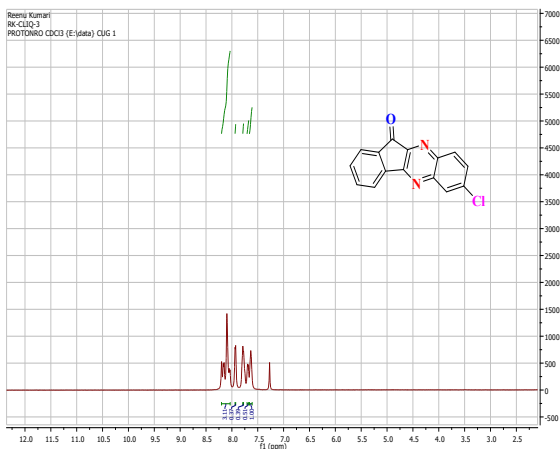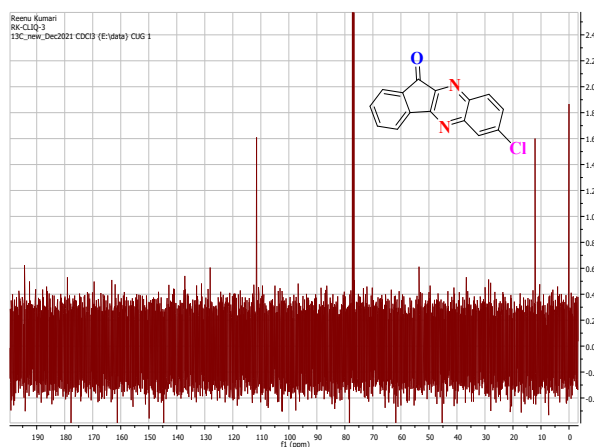

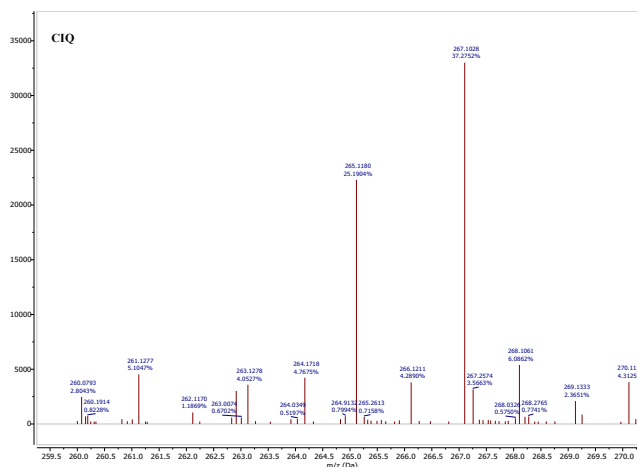

**Fig S3.**  $^1\text{H}$ ,  $^{13}\text{C}$  NMR, and mass spectra for CIQ.

Pale-yellow powder yield (87%) is analyzed with  $^1\text{H}$  NMR 500 MHz ( $\text{CDCl}_3$ )  $\delta$  ppm: 7.62 (s, 1H), 7.68 (d, 1H,  $J=12.5$  Hz), and aromatic protons: 7.78-8.20 (m, 5H).  $^{13}\text{C}$  NMR 125 MHz ( $\text{CDCl}_3$ )  $\delta$  (ppm): 194.3, 178.7, 163.1, 146.2, 142.8, 137.4, 137.1, 132.9, 131.1, 128.0, 112.5, 111.5, 110.8, 110.6, and 109.4. Mass analysis:  $m/z=266.1$  (Fig S3) [3].

**General procedures for the preparation of starting material:**

**Scheme S4.** The 4-nitrobenzaldehyde (100 mmol, 1.0 eq, 6.6 mL) (Table S4) with LiBr (catalytic amount) in DMF were separately taken in RB and stirred for 1h at RT. The reaction was monitored with TLC, product was filtered and dried under vacuum. Structure was analyzed with  $^1\text{H}$  NMR.

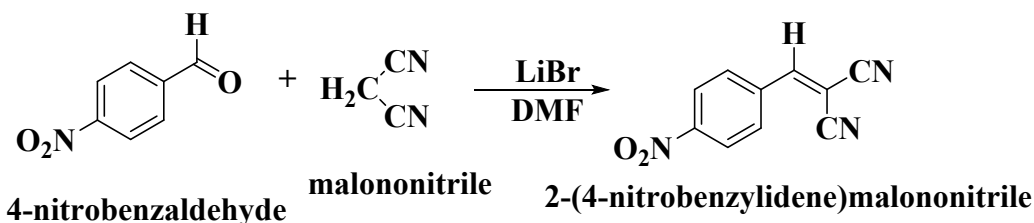

**Table S4.** 2-(4-nitrobenzylidene)malononitrile (Scheme S4).

| Chemical Name       | Mol. wt.(g) | mmol  | Quantity(g) | Equivalent |
|---------------------|-------------|-------|-------------|------------|
| Malononitrile       | 66.0        | 100.0 | 6.6         | 1.0 eq     |
| 4-nitrobenzaldehyde | 151.121     | 100.0 | 15.1 mL     | 1.0 eq     |
| Lithium bromide     | 86.8        | 100.0 | -           | 1.0 eq     |
| DMF solvent         |             |       | 10.0 mL     |            |

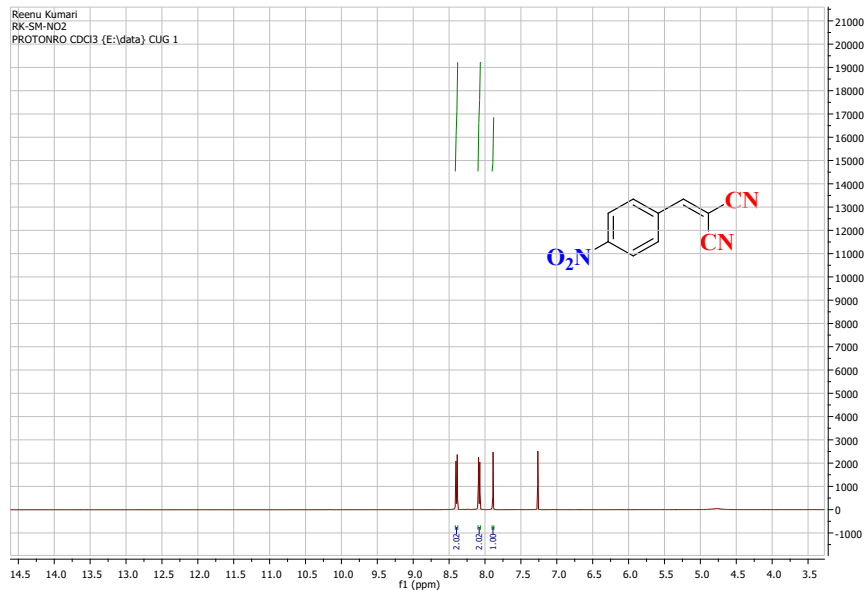

**Fig S4.** Pale light-yellow powder yield (94%) is analyzed with  $^1\text{H}$  NMR 500 MHz ( $\text{CDCl}_3$ )  $\delta$  (ppm): 8.39 (d, 2H,  $J=8.5$  Hz), 8.08 (d, 2H,  $J=8.5$  Hz), 7.88 (s, 1H).

### Synthesis of SIQPNO<sub>2</sub>

**Scheme S5.** Synthesis of 7-nitro-2'-(4-nitrophenyl)-5',6',7',7a'-tetrahydrospiro[indeno[1,2-b]quinoxaline-11,3'-pyrrolizine]-1',1'(2'H)-dicarbonitrile (SIQPNO<sub>2</sub>).

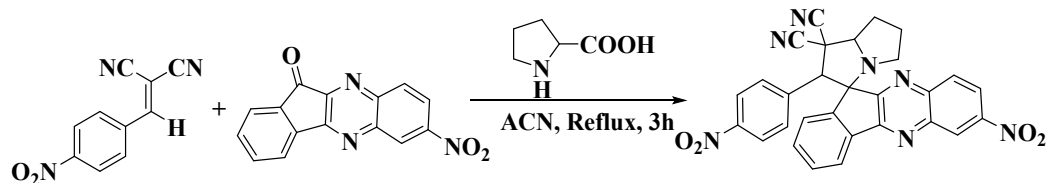

**Table S5.** Synthesis of SIQPNO<sub>2</sub> (Scheme S5).

| Chemicals                           | Mol. wt.(g) | mmol | Quantity(g) | Equivalent |
|-------------------------------------|-------------|------|-------------|------------|
| 2-(4-nitrobenzylidene)malononitrile | 154.5       | 1.0  | 154.5       | 1.0 eq     |
| NIQ                                 | 277.0       | 1.0  | 277.0       | 1.0 eq     |
| L-proline                           | 115.0       | 1.0  | 126.5       | 1.0 eq     |
| Acetonitrile                        |             |      | 15.0 mL     | ~8.0 eq    |

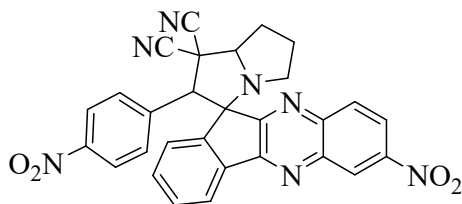

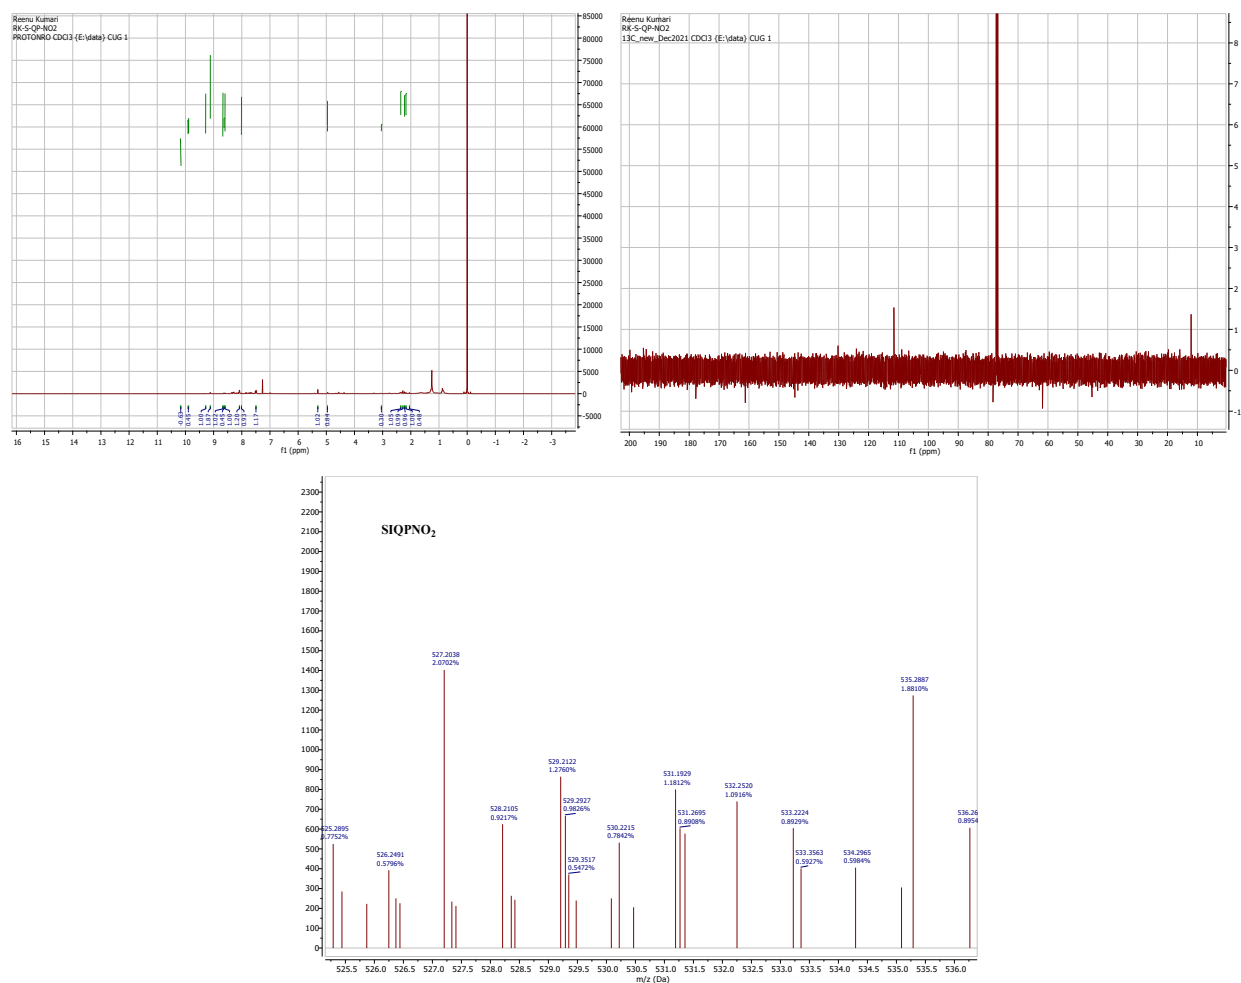

**Fig S5 (a-c).** <sup>1</sup>H, <sup>13</sup>C NMR, and mass analysis of SIQPNO<sub>2</sub>.

Light yellow solid yield (89%) is analyzed with <sup>1</sup>H NMR 500 MHz (CDCl<sub>3</sub>) δ ppm: Aromatic protons 10.16 (s, 1H), 9.90 (d, 1H, *J*=10 Hz), 9.28 (d, 1H, *J*=4.5 Hz), 9.117 (d, 2H, *J*=3.5 Hz), 8.67 (d, 1H, *J*=2.5 Hz), 8.62 (d, 1H, *J*=2.5 Hz), 8.59 (d, 1H, *J*=2.5 Hz), 8.08 (m, 1H), 8.01 (d, 1H, *J*=7 Hz), 7.49 (m, 1H), 5.3(s, 1H), 4.95 (d, 1H, *J*=5.5 Hz), 2.04-3.04 (m, 6H, 3CH<sub>2</sub>) (Fig S5a). <sup>13</sup>C NMR 125 MHz (CDCl<sub>3</sub>) δ ppm: 168.0, 152.9, 150.5, 144.7, 143.6, 143.6, 138.6, 137.6, 136.1, 130.9, 130.21, 130.20, 128.1, 128.05, 126.9, 124.06, 123.5, 123.16, 121.95, 121.8, 121.7, 111.5, 111.1, 78.7, 61.3, 59.57, 46.57, 27.26, 26.3, 12 (Fig S5b). Mass analysis: m/z=529.2 (Fig S5c).

**Scheme S6.** A 1:1 ratio of SIQPI+NIQ (Fig S6a-b).

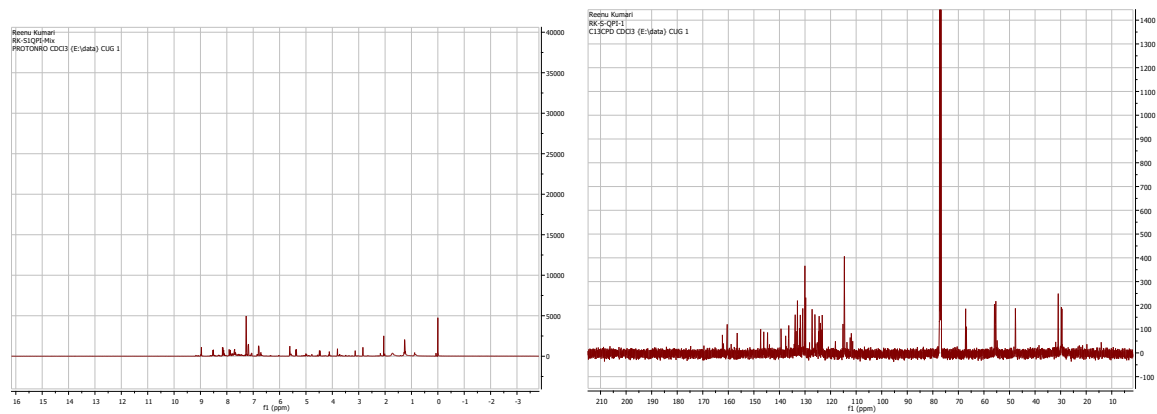

**Fig S6a-b.**  $^1\text{H}$  and  $^{13}\text{C}$  NMR for Scheme S6 (125 MHz ( $\text{CDCl}_3$ )  $\delta$  ppm): 160.4, 156.5, 147.4, 146.3, 146.2, 144.3, 139.2, 137.5, 136.3, 133.9, 132.9, 132.1, 131.8, 130.0, 129.7, 127.1, 126.0, 124.0, 123.2, 113.5, 111.9, 111.3, 66.8, 54.9, 47.6, 30.9, 29.7, 29.4, and 14.1.

**Scheme S7.** 1:1 ratio of SIQP<sub>II</sub>+NIQ (**Fig S7a-b**).

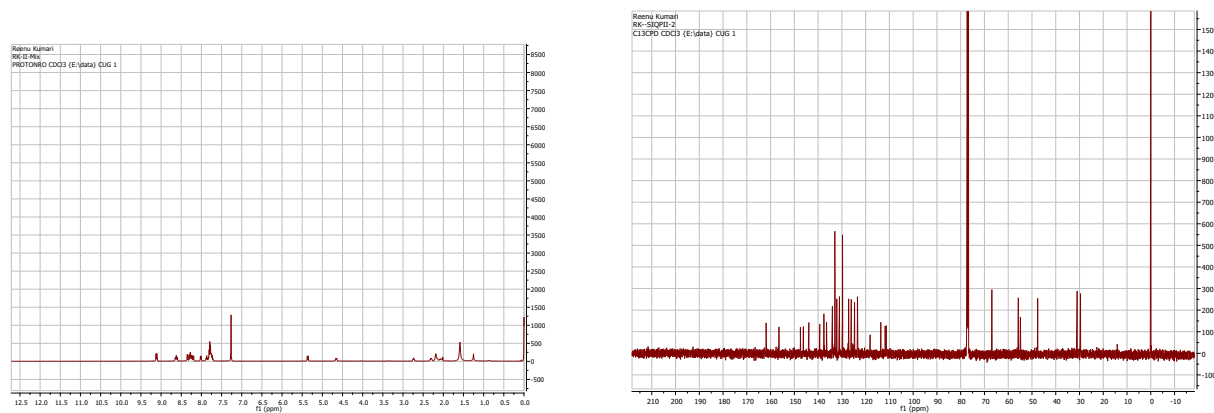

**Fig S7a-b.**  $^1\text{H}$  and  $^{13}\text{C}$  NMR for Scheme S7 (125 MHz ( $\text{CDCl}_3$ )  $\delta$  ppm): 161.9, 157.7, 156.4, 147.4, 146.2, 143.9, 139.3, 137.5, 136.4, 133.9, 132.9, 132.1, 131.0, 130.9, 129.7, 127.1, 126.0, 124.6, 123.4, 118.1, 113.6, 111.7, 111.3, 66.8, 54.8, 47.6, 30.9, 29.7, 29.5, and 14.1.

**Scheme S8.** A 1:1 ratio of SIQP<sub>III</sub>+NIQ (**Fig S8a-b**).



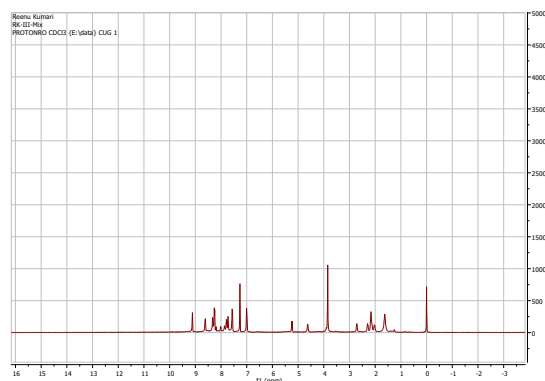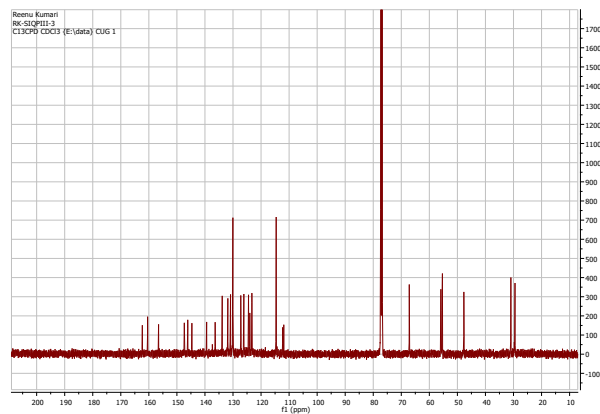

**Fig S8a-b.**  $^{13}\text{C}$  NMR for Scheme S8 (125 MHz ( $\text{CDCl}_3$ )  $\delta$  ppm): 187.4, 170.7, 162.3, 160.4, 156.5, 147.3, 146.1, 144.6, 139.3, 137.3, 136.3, 133.8, 131.8, 130.8, 130.0, 127.2, 126.1, 124.5, 124.0, 123.2, 114.6, 112.4, 111.8, 67.1, 55.9, 55.5, 55.3, 47.6, 30.9, and 29.4.

**Scheme S9.** Reaction scope, all reactions could carry out with ninhydrin (10 mmol, 1.0 eq, 1.8 g) and stirred in a solvent mixture of  $\text{CH}_3\text{COOH}$  (10 mL) and  $\text{CH}_3\text{OH}$  (30 mL) 1:3 ratio for 30 min at RT for IQPs) [1].

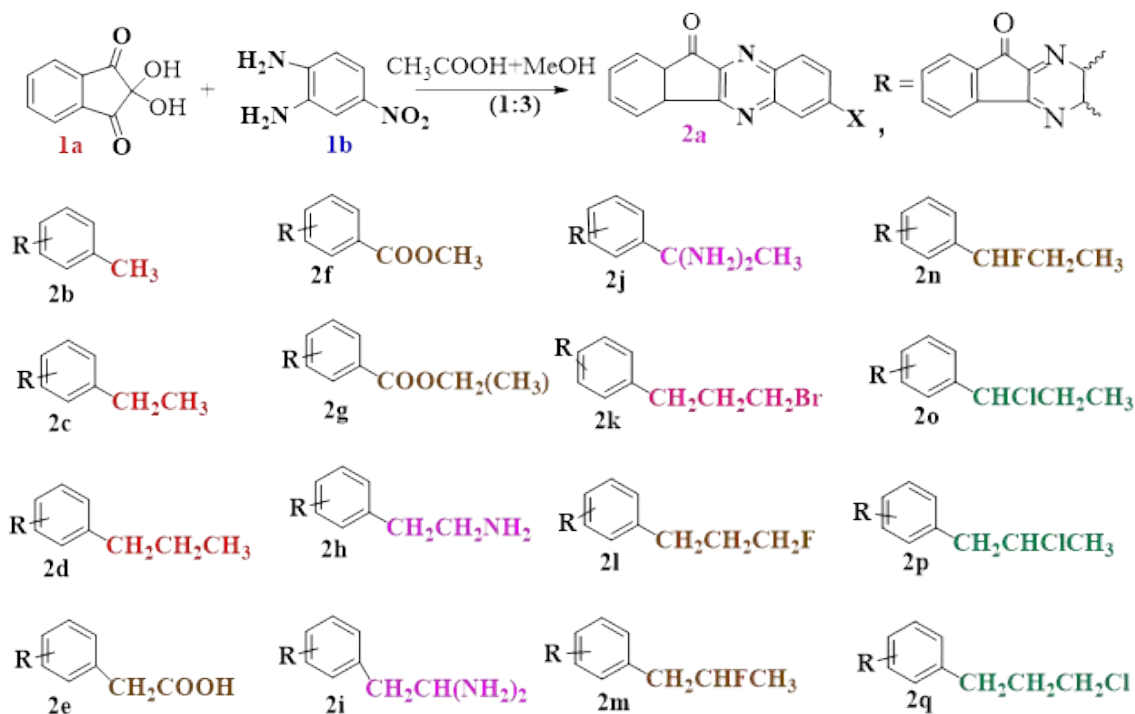

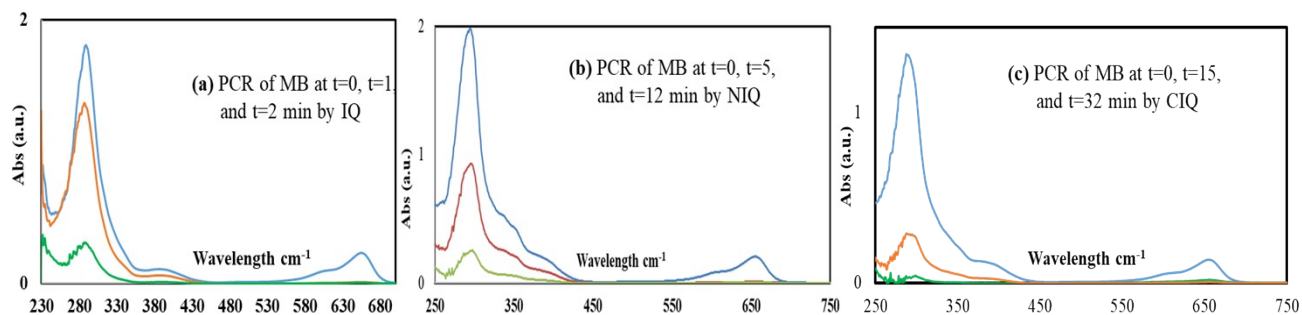

**Fig S9.** UV-Vis spectra for MB PCR by (a) IQ, (b) NIQ, and (c) CIQ.

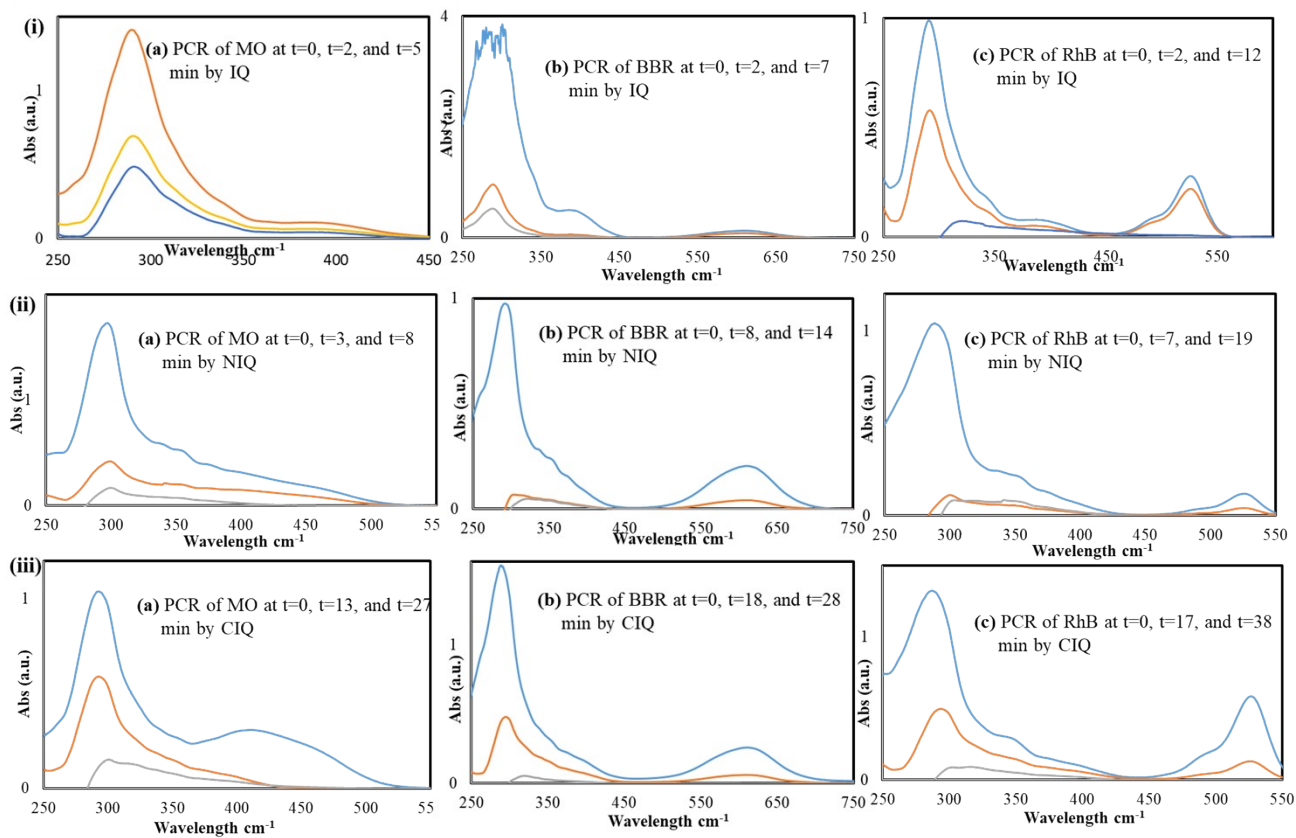

**Fig S10.** UV-Vis for (a) MO, (b) BBR, and (c) RhB PCR by (i) IQ, (ii) NIQ, and (iii) CIQ.

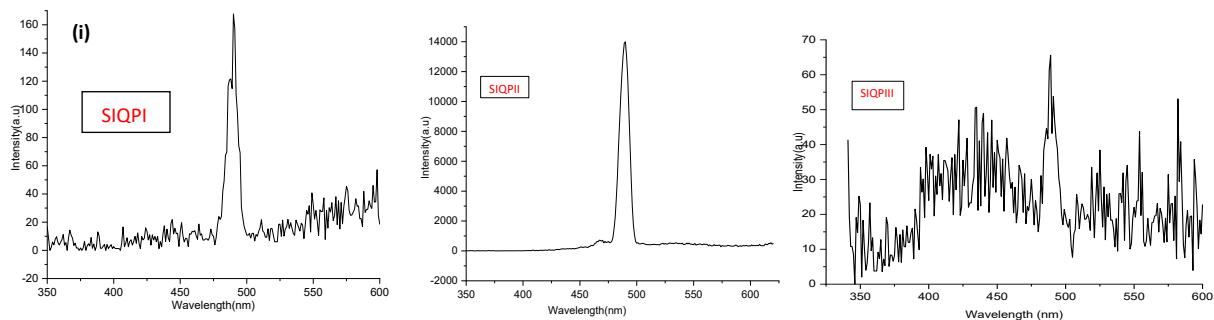

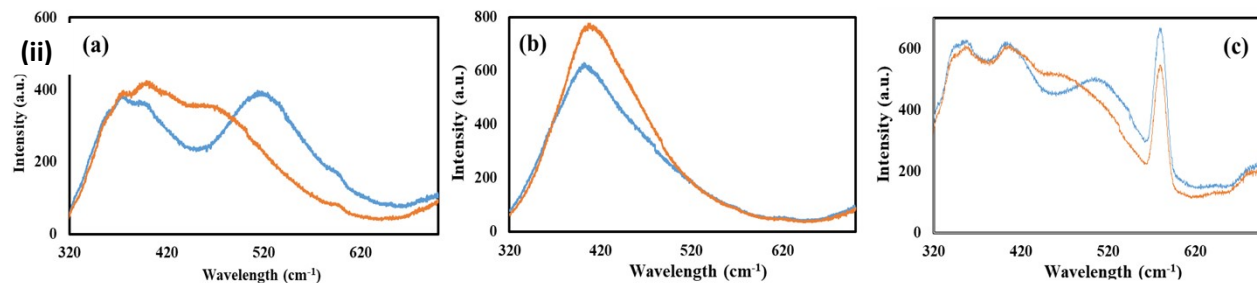

**Fig S11.** Fluorescence: (i) alone SIQPI, II, III (Note: taken from previous study for comparison) [2] (ii) before and after MO reduction by (a) IQ, (b) NIQ, and (c) CIQ.

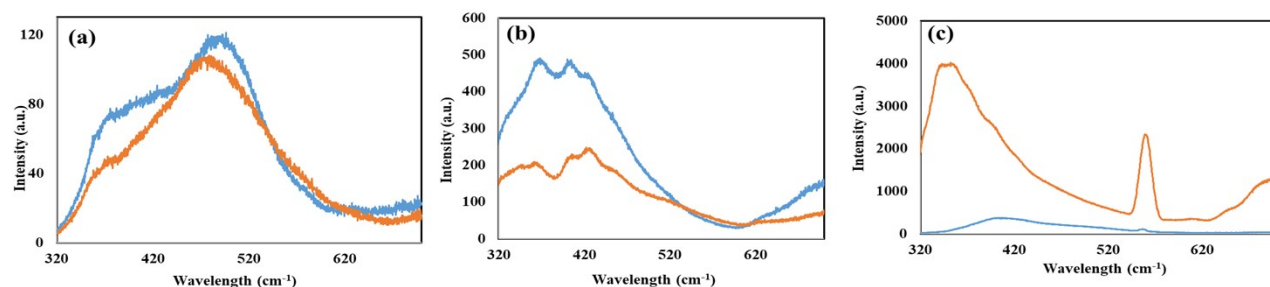

**Fig S12.** Fluorescence before and after BBR reduction by (a) IQ, (b) NIQ, and (c) CIQ.

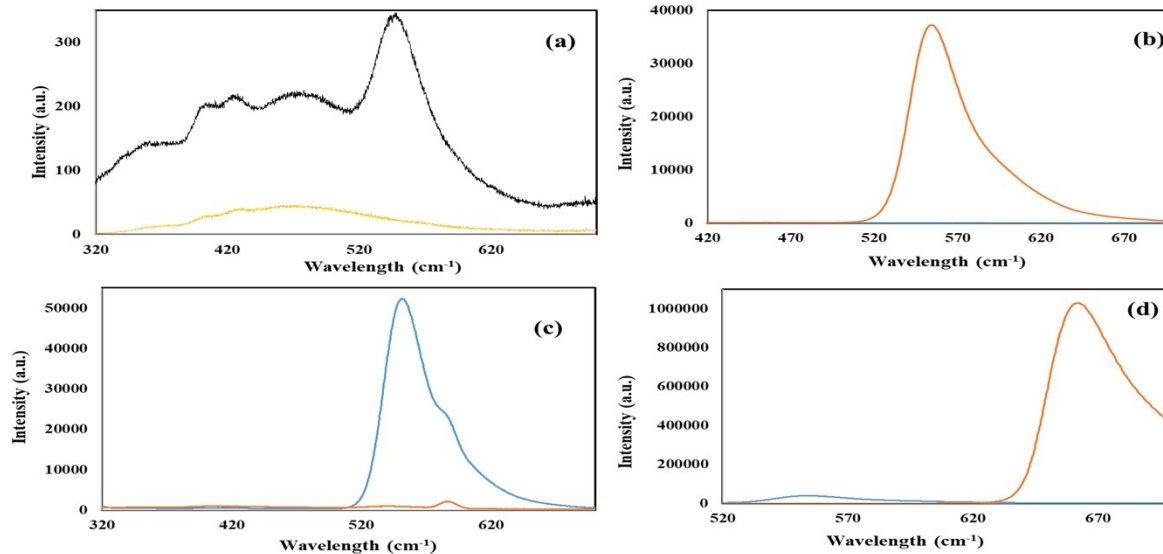

**Fig S13.** Fluorescence before and after RhB reduction using (a) IQ (b) NIQ (c) CIQ and (d) SIQPNO<sub>2</sub>.

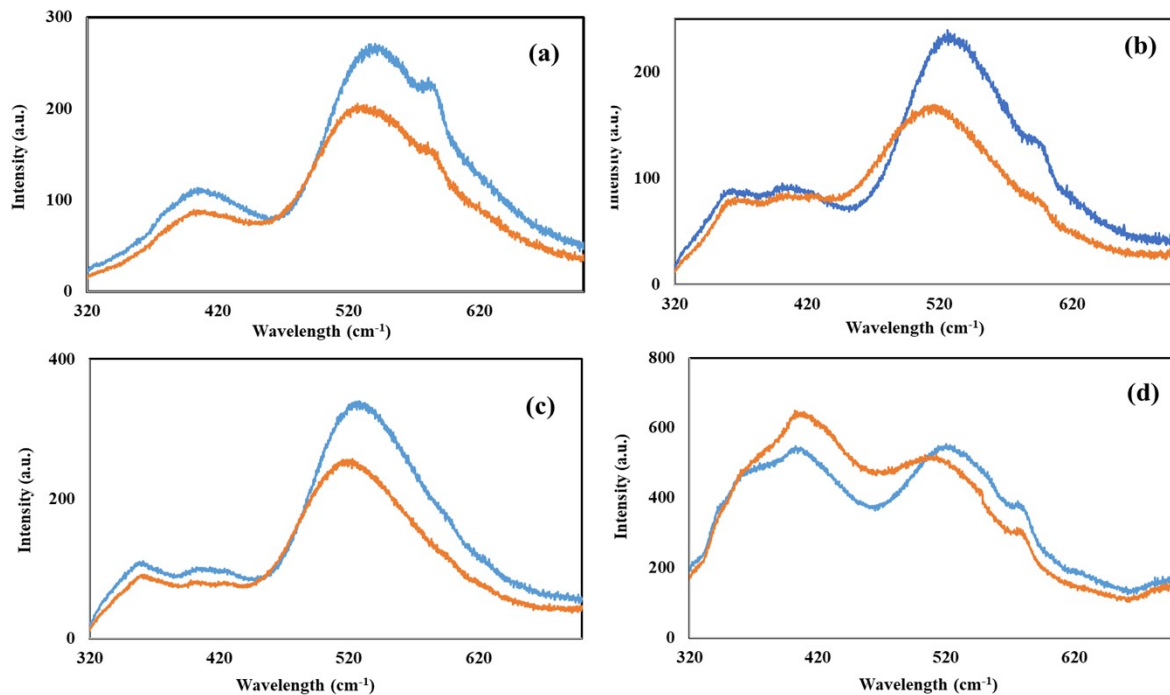

**Fig S14.** Fluorescence before and after MO reduction using IQ with (a) LaGT, (b) CeGT, (c) TbGT, and (d) HoGT.

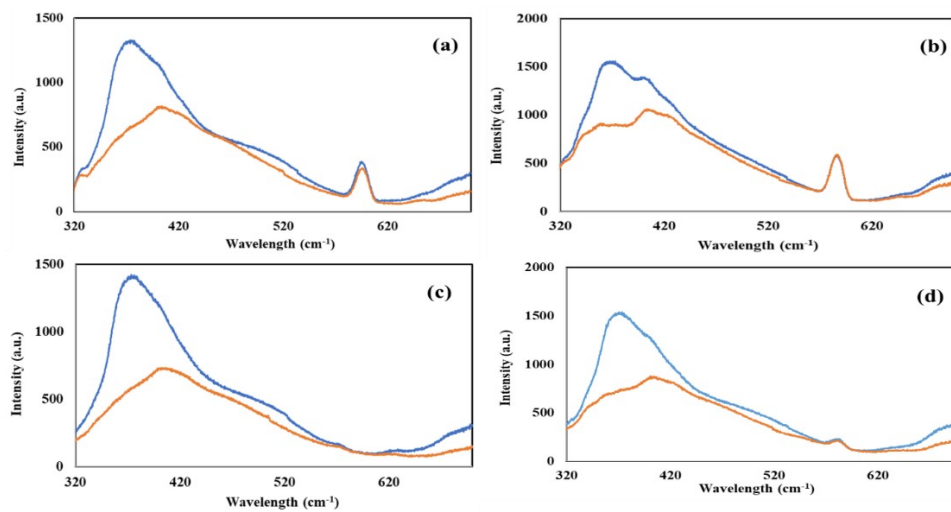

**Fig S15.** Fluorescence before and after BBR reduction using IQ with (a) LaGT, (b) CeGT, (c) TbGT, and (d) HoGT.

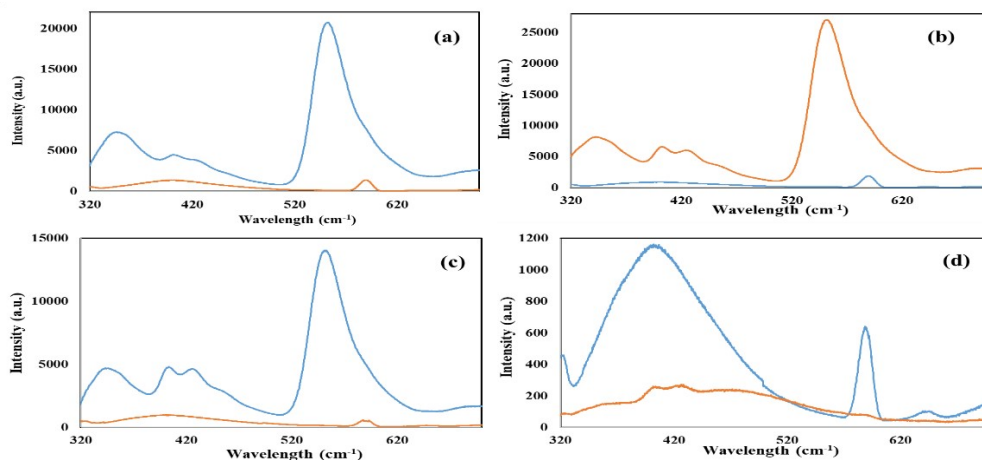

**Fig S16.** Fluorescence before and after RhB reduction using IQ with **(a)** LaGT, **(b)** CeGT, **(c)** TbGT, and **(d)** HoGT.

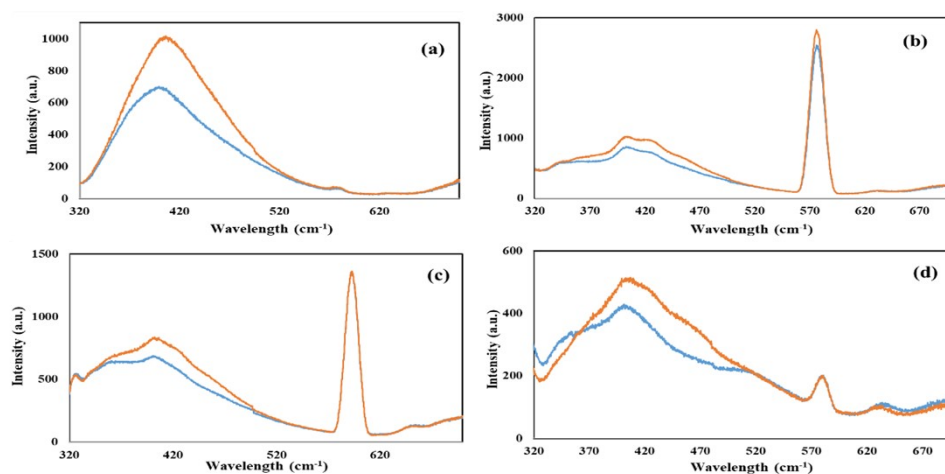

**Fig S17.** Fluorescence before and after MO reduction using NIQ with **(a)** LaGT, **(b)** CeGT, **(c)** TbGT, and **(d)** HoGT.

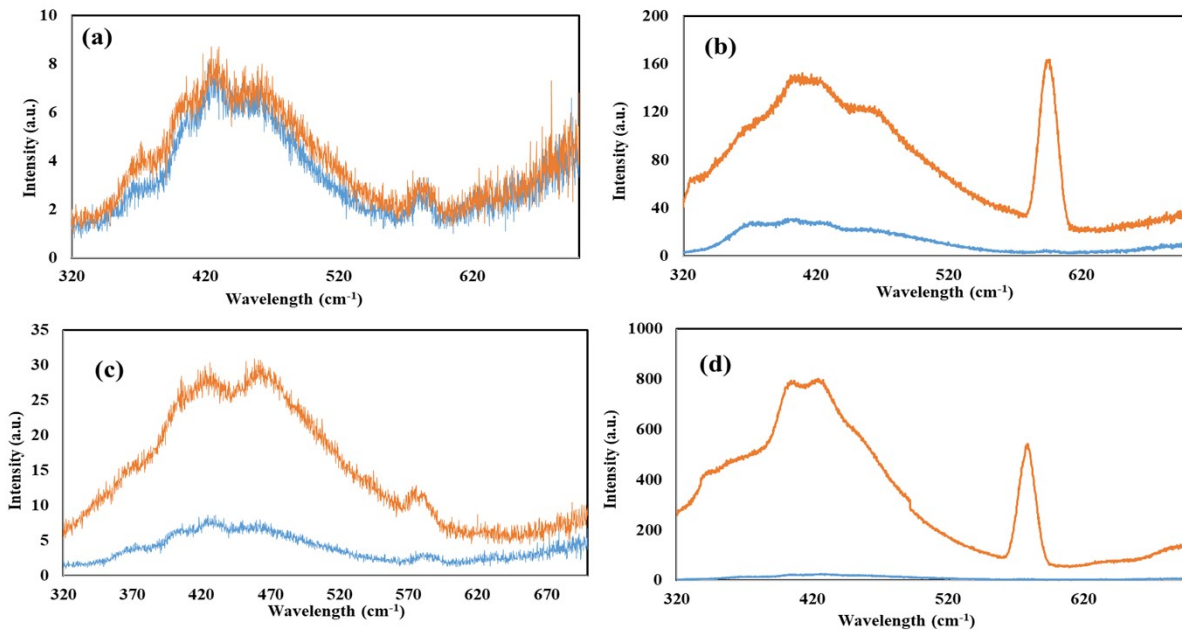

**Fig S18.** Fluorescence before and after BBR reduction using NIQ with (a) LaGT, (b) CeGT, (c) TbGT, and (d) HoGT.

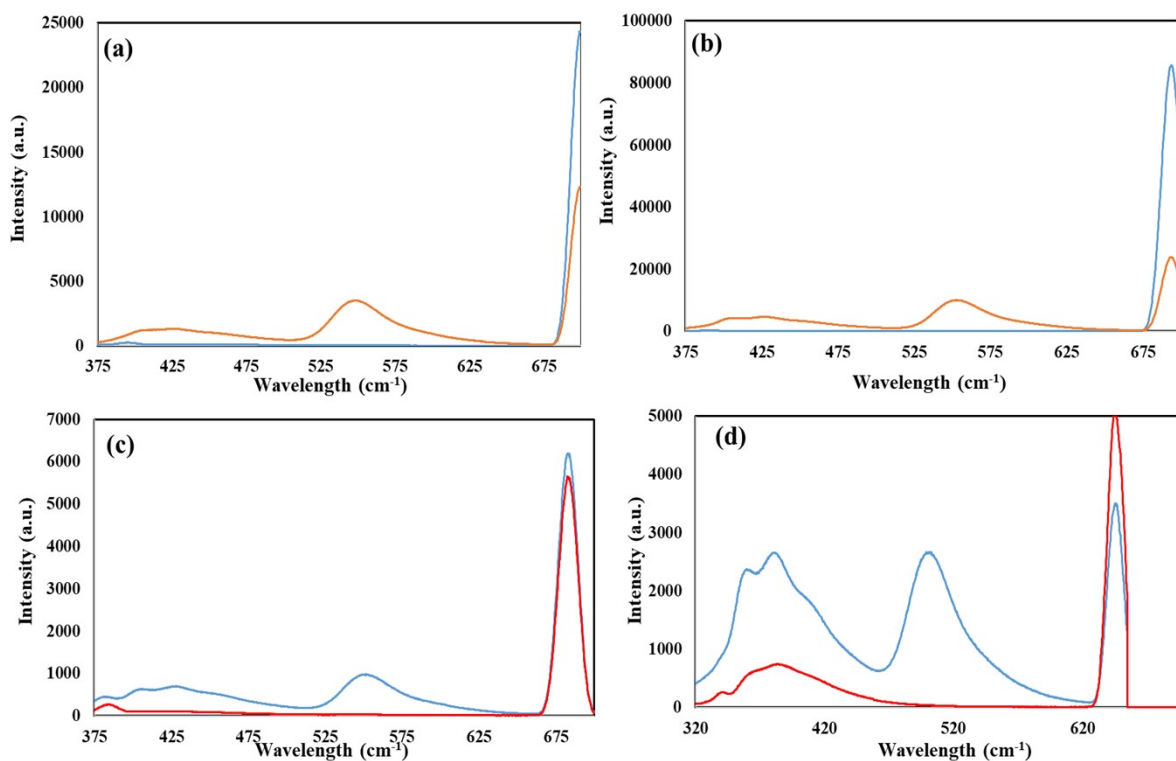

**Fig S19.** Fluorescence before and after RhB reduction using NIQ with (a) LaGT, (b) CeGT, (c) TbGT, and (d) HoGT.

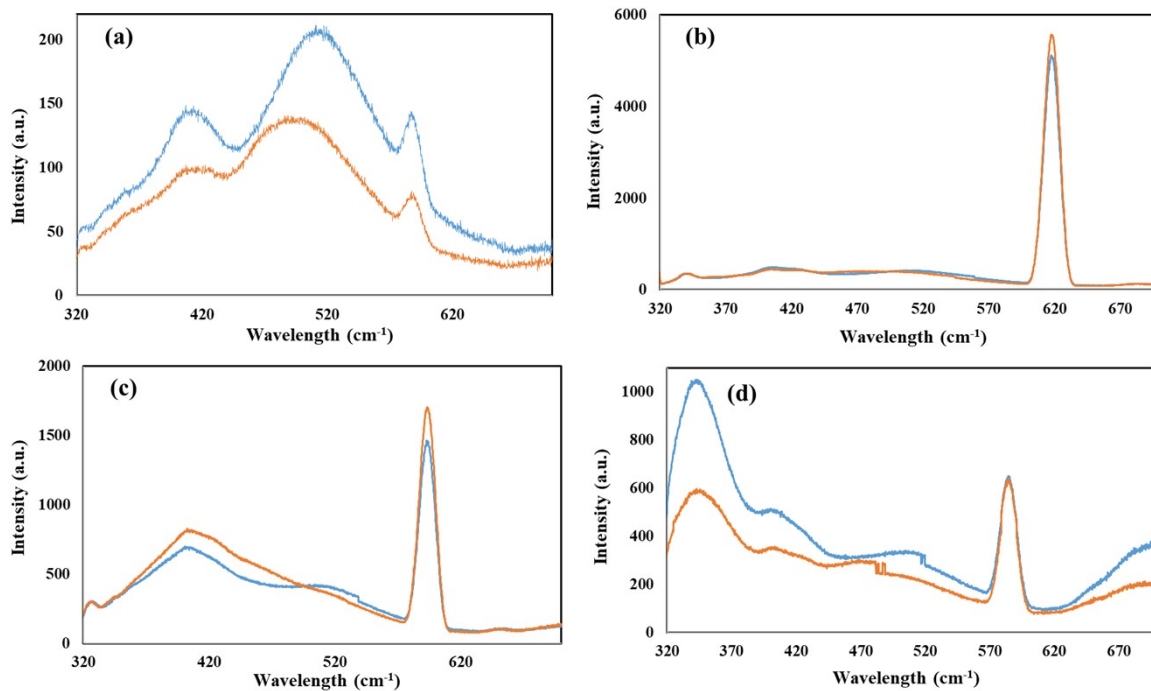

**Fig S20.** Fluorescence before and after MO reduction using CIQ with (a) LaGT, (b) CeGT, (c) TbGT, and (d) HoGT.

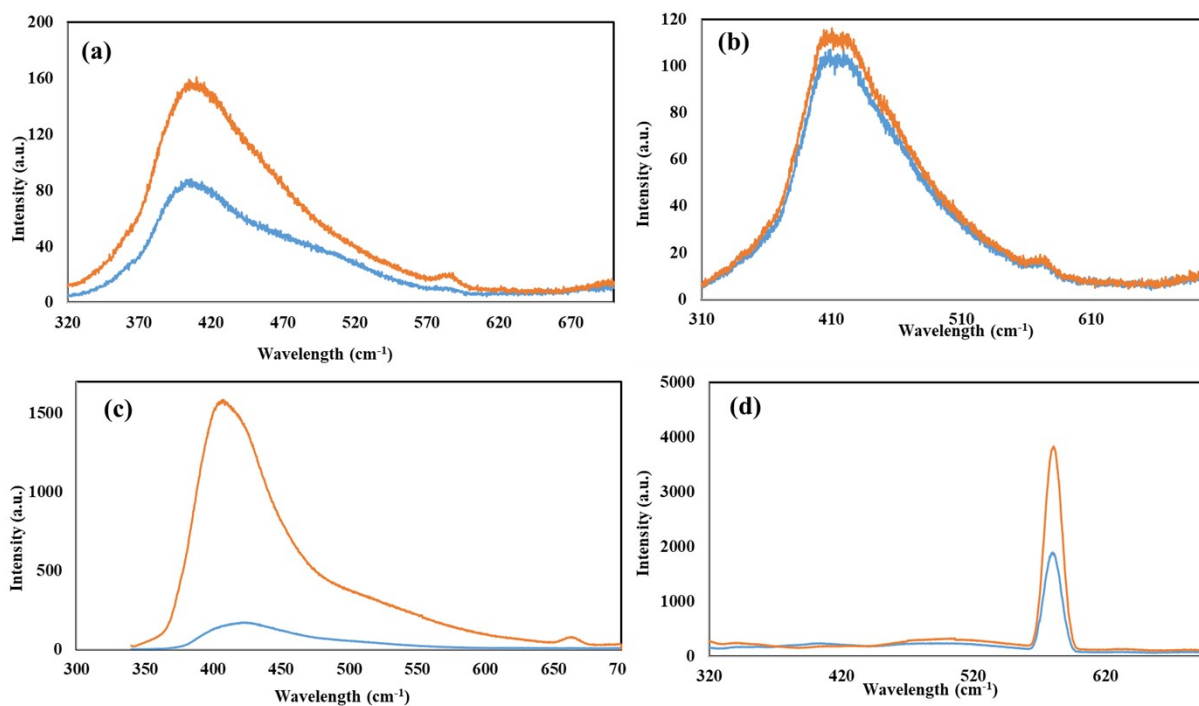

**Fig S21.** Fluorescence before and after BBR reduction using with CIQ (a) LaGT, (b) CeGT, (c) TbGT, and (d) HoGT.



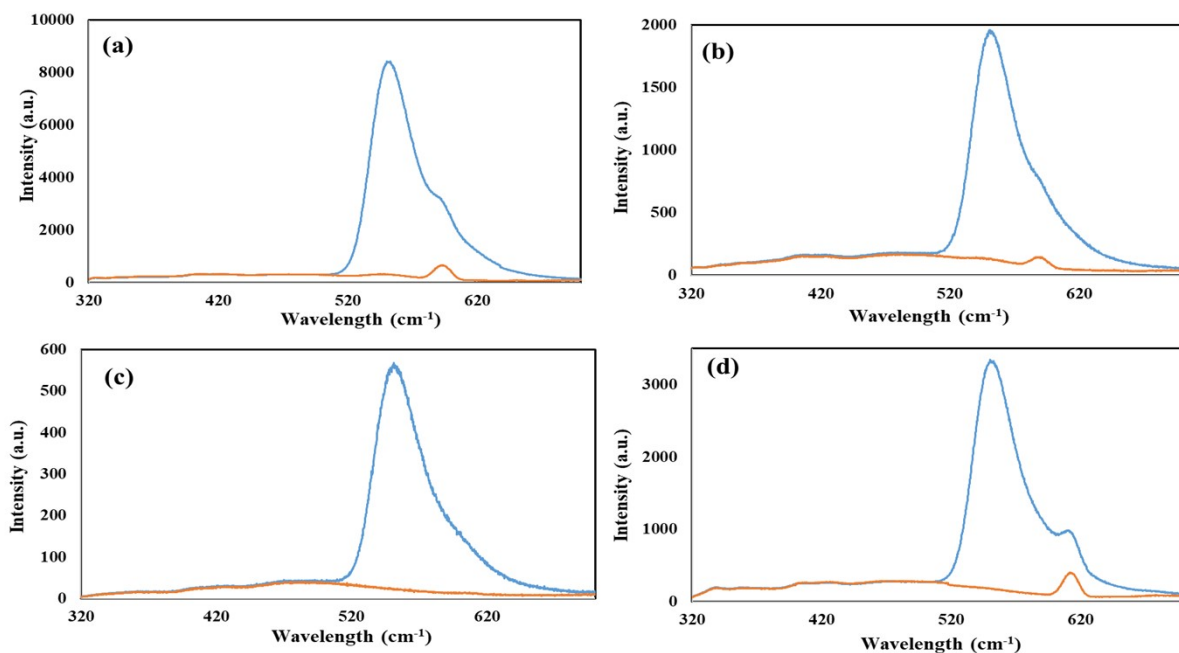

**Fig S22.** Fluorescence before and after RhB reduction using CIQ with (a) LaGT, (b) CeGT, (c) TbGT, and (d) HoGT.

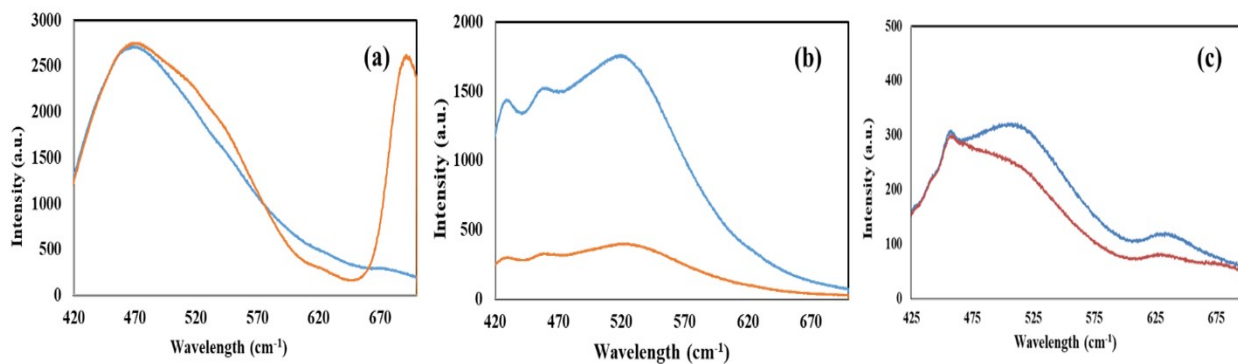

**Fig S23.** Fluorescence before and after reduction of (a) MB, (b) MO, and (c) BBR by SIQPNO<sub>2</sub>.



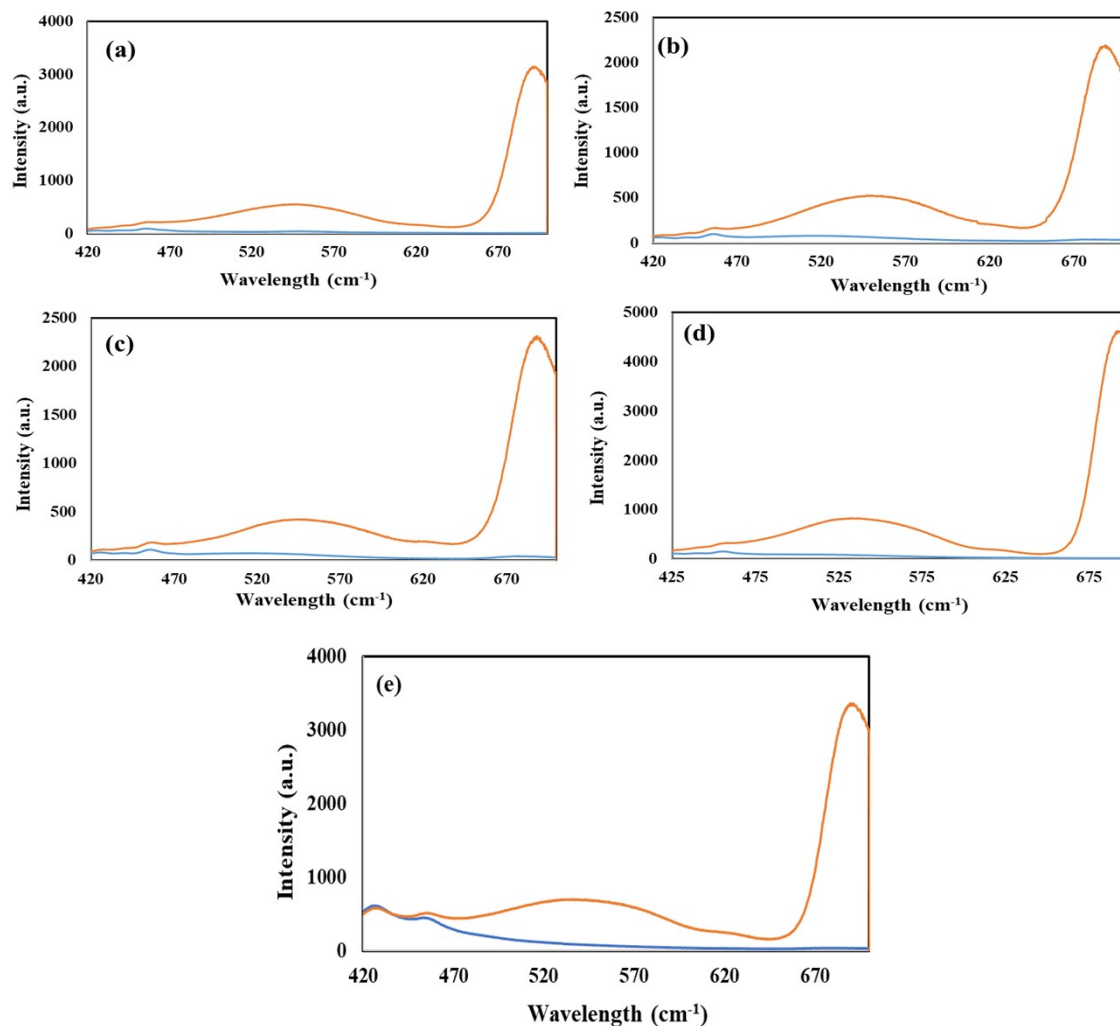

**Fig. S24.** Fluorescence before and after MB reduction using SIQPNO<sub>2</sub> with (a) LaGT, (b) CeGT, (c) TbGT, (d) HoGT, and (e) NIQ.

**Table S6.** Comparative study of RhB, BBR, MO, and MB with HoGT, CeGT, TbGT, and LaGT

|          | HoGT               | CeGT | TbGT | LaGT | HoGT               | CeGT | TbGT | LaGT | HoGT              | CeGT | TbGT | LaGT | HoGT              | CeGT | TbGT | LaGT |
|----------|--------------------|------|------|------|--------------------|------|------|------|-------------------|------|------|------|-------------------|------|------|------|
|          | RhB PCR time (min) |      |      |      | BBR PCR time (min) |      |      |      | MO PCR time (min) |      |      |      | MB PCR time (min) |      |      |      |
| <b>a</b> | 86                 | 76   | 73   | 55   | 28                 | 30   | 25   | 12   | 21                | 25   | 17   | 15   | 13                | 10   | 11   | 7    |
| <b>b</b> | 90                 | 78   | 78   | 61   | 33                 | 38   | 32   | 25   | 22                | 34   | 16   | 08   | 28                | 31   | 23   | 18   |
| <b>c</b> | 77                 | 84   | 68   | 60   | 28                 | 33   | 28   | 21   | 16                | 31   | 23   | 18   | 51                | 55   | 45   | 33   |
| <b>d</b> |                    |      |      |      |                    |      |      |      |                   |      |      |      | 197               | 242  | 225  | 88   |

using (i) a=IQ, (ii) b=NIQ, (iii) c=CIQ, and (iv) d=SIQPNO<sub>2</sub>.

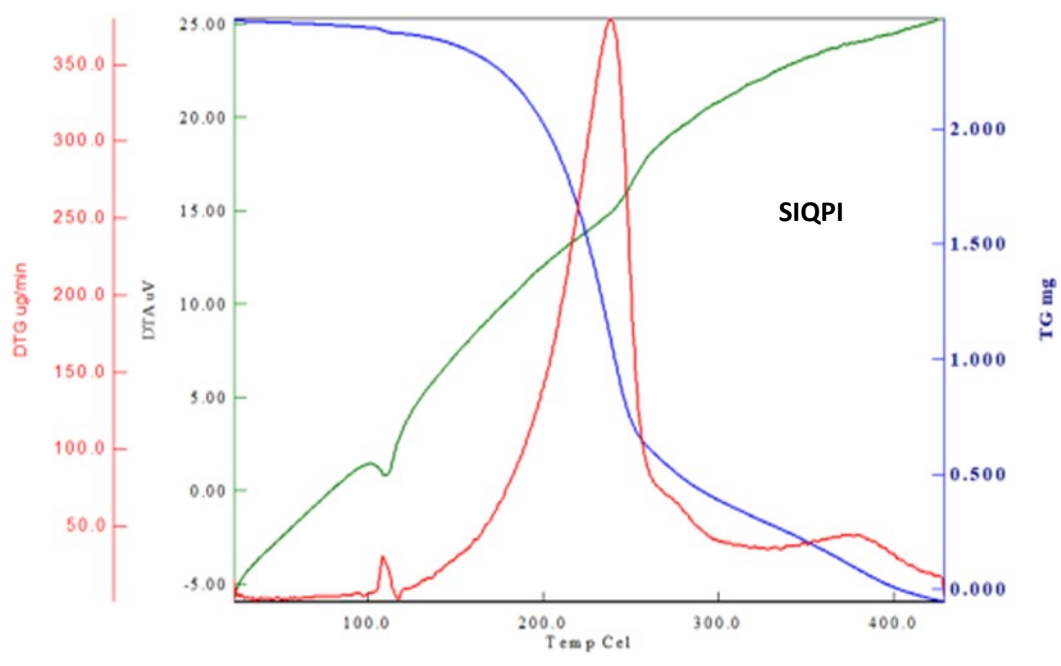

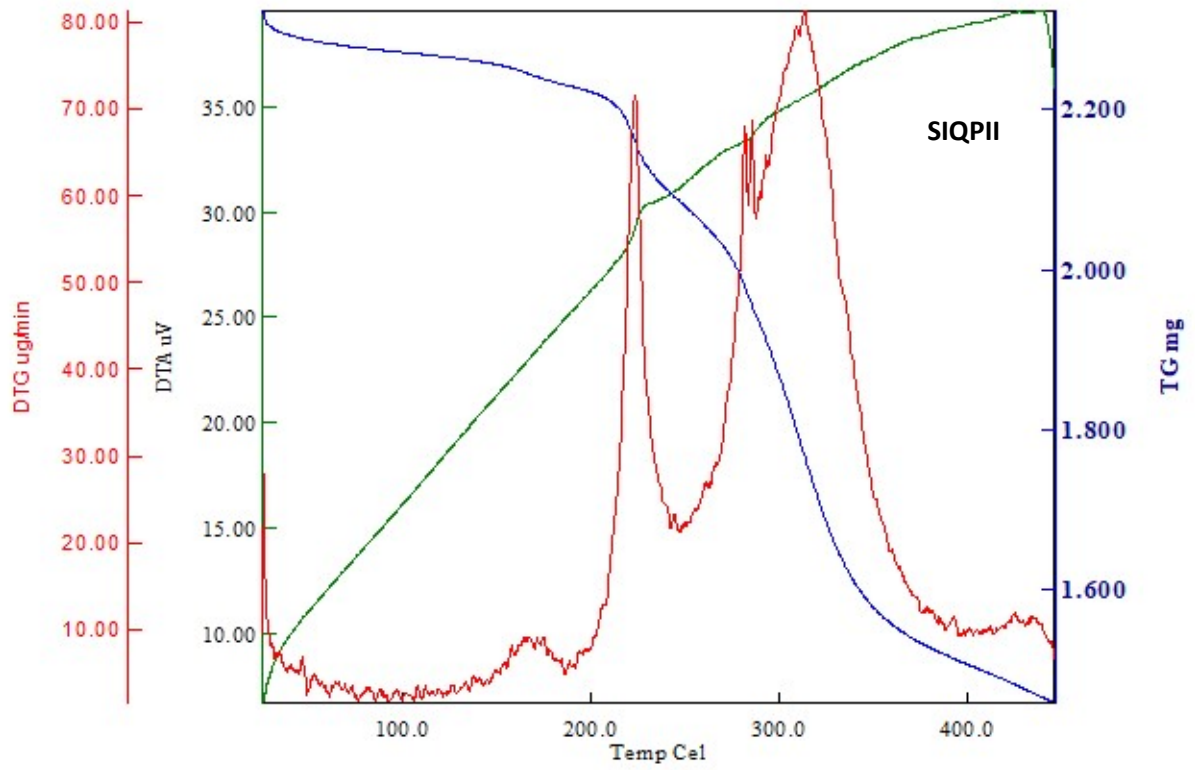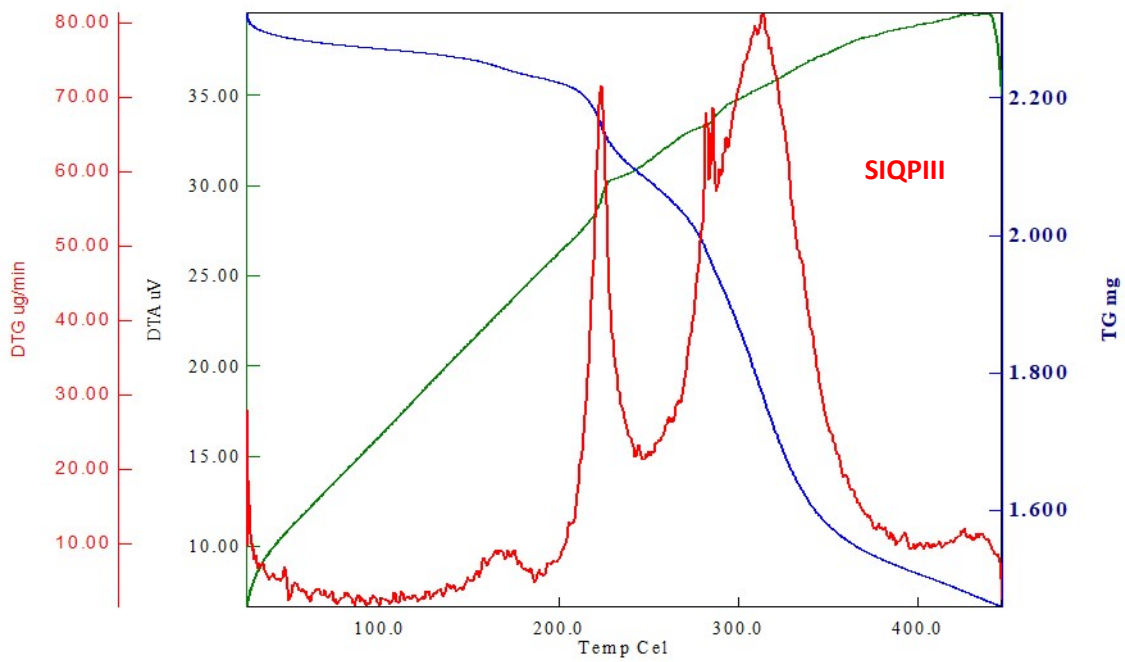

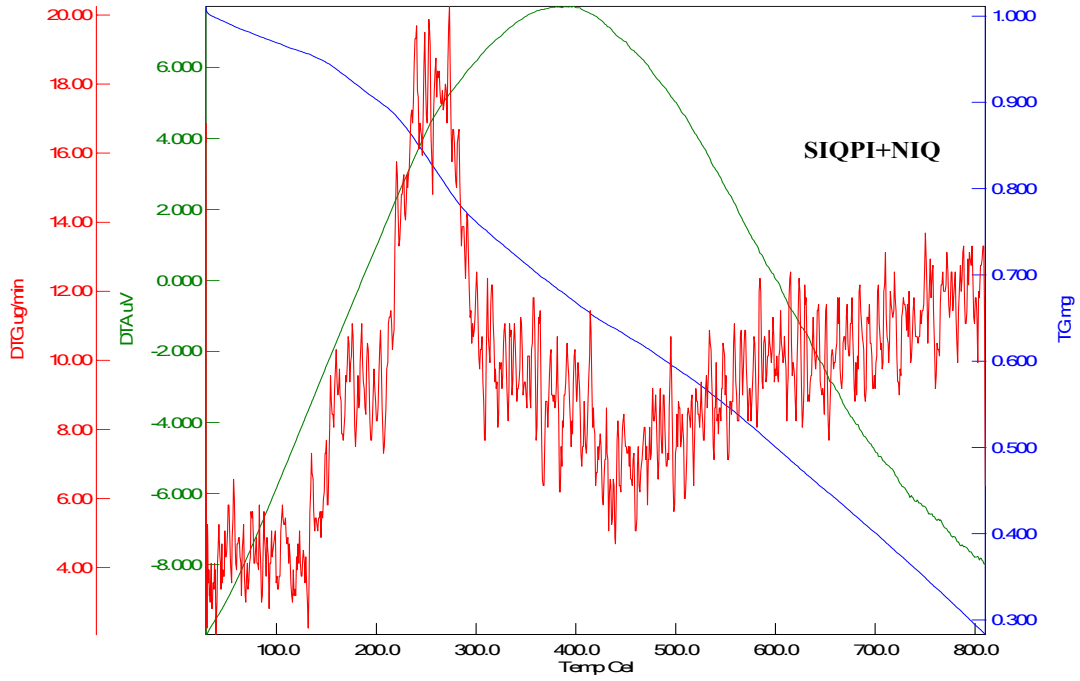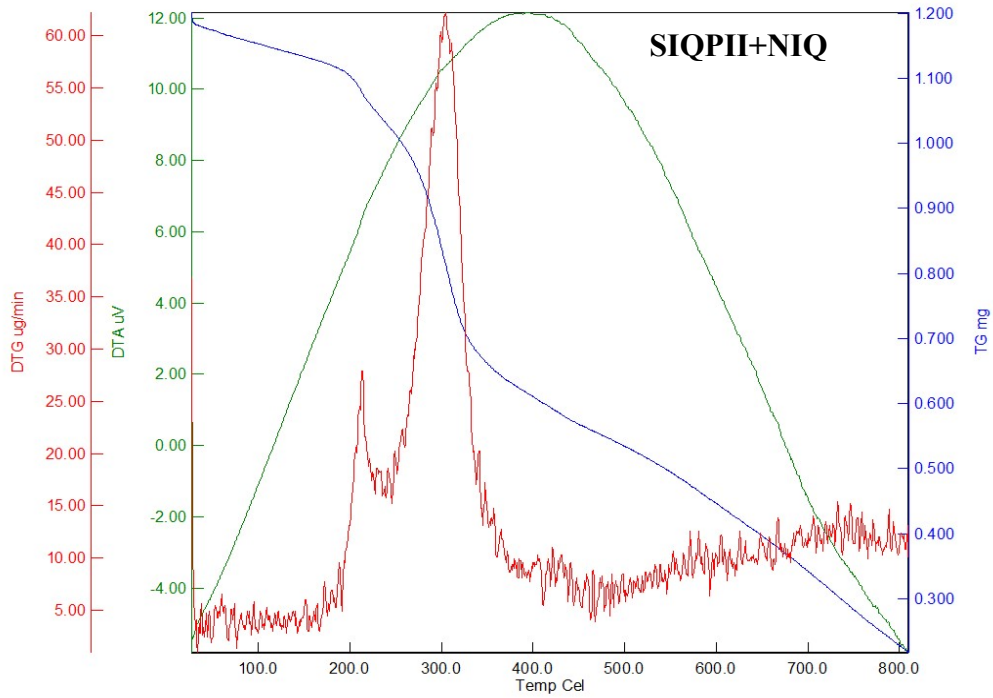

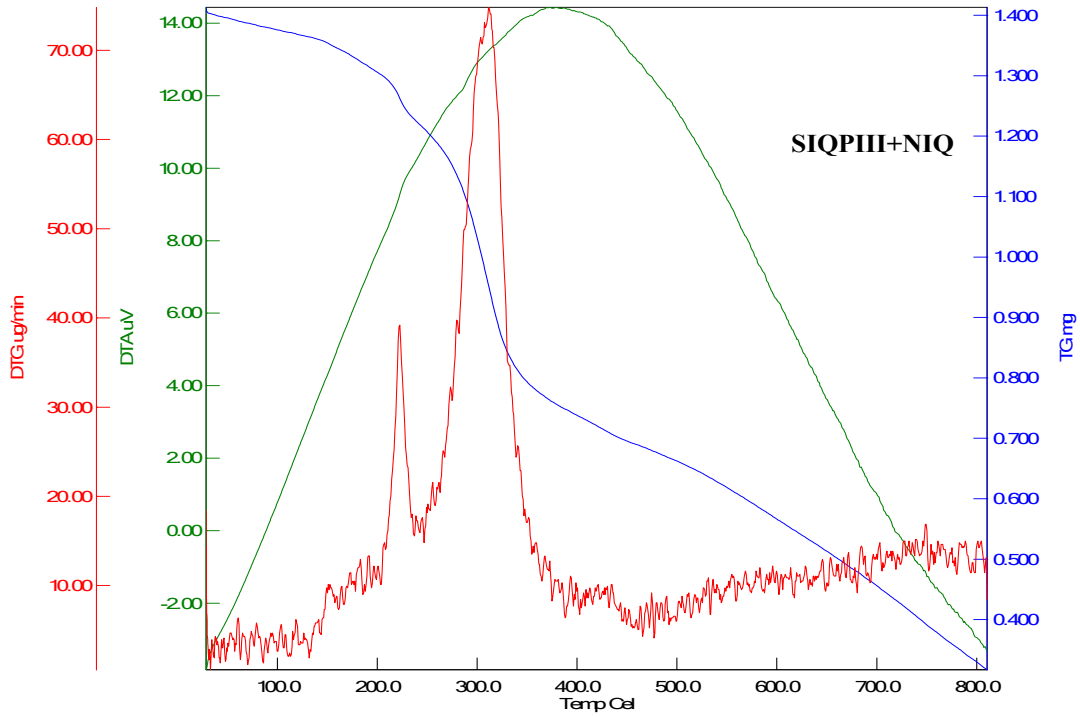

**Fig S25.** TGA of SIQPI, II, III, (Note: taken from previous study for comparison) [1] and SIQPI+NIQ, SIQPII+NIQ, and SIQPIII+NIQ.

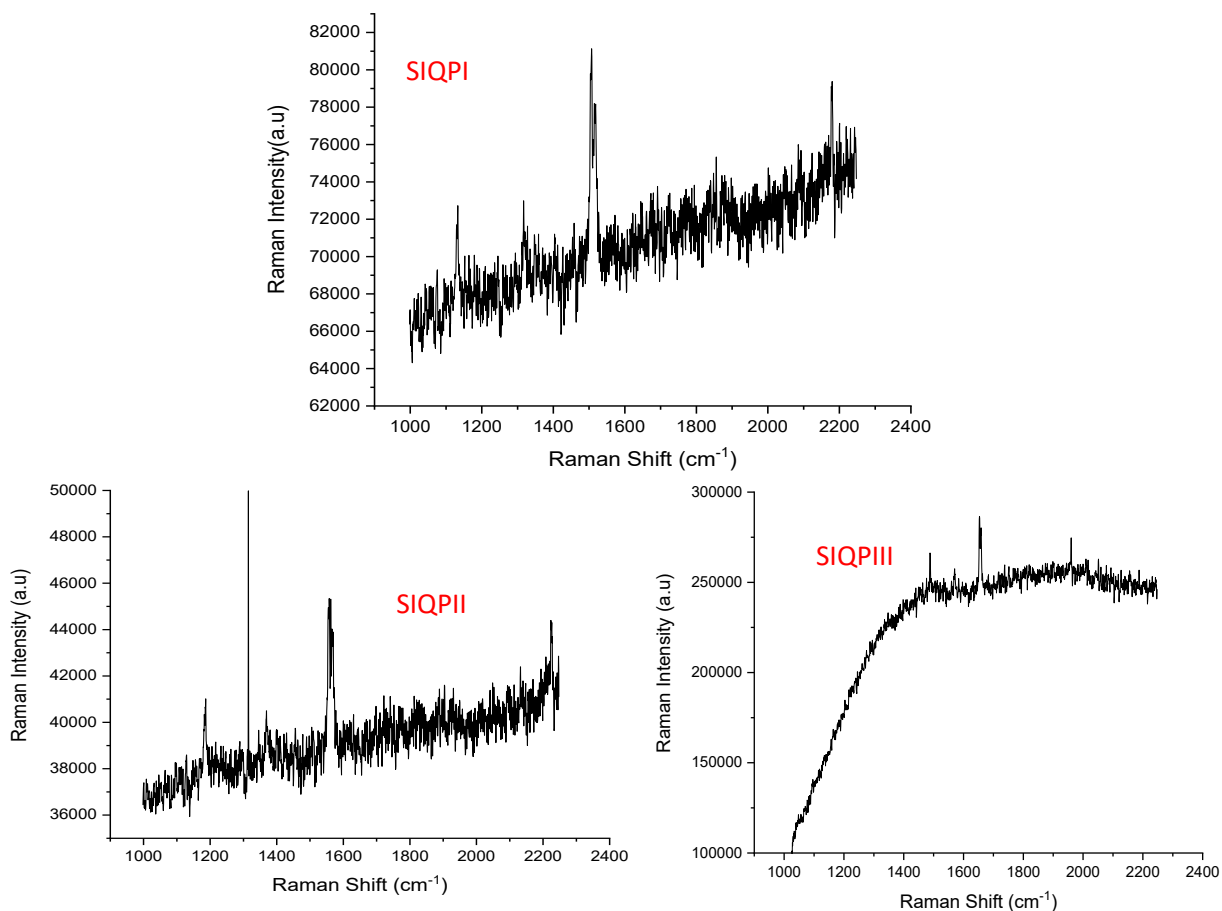

**Fig S26 (a).** Raman of alone SIQPI, II, and III (Note: taken from previous study for comparison) [1].

**Table S7.** Elemental study for C, N, and H % with IQPs, SIQPNO<sub>2</sub>, SIQPs+NIQ, and SIQPNO<sub>2</sub>+NIQ.

| Molecules                | N (%)  | C (%)  | H (%) | S (%) | O (%) | wt (mg) |
|--------------------------|--------|--------|-------|-------|-------|---------|
| IQ                       | 11.482 | 75.502 | 3.318 | -     | -     | 1.029   |
| NIQ                      | 14.714 | 63.039 | 2.489 | -     | -     | 1.047   |
| CIQ                      | 10.509 | 65.867 | 2.532 | -     | -     | 1.030   |
| SIQPNO <sub>2</sub>      | 13.915 | 66.049 | 4.627 | -     | -     | 1.008   |
| I+NIQ                    | 14.850 | 62.267 | 2.449 | -     | -     | 1.054   |
| II+NIQ                   | 14.913 | 62.252 | 2.487 | -     | -     | 1.027   |
| III+NIQ                  | 15.578 | 63.025 | 2.668 | -     | -     | 1.037   |
| SIQPNO <sub>2</sub> +NIQ | 14.893 | 62.505 | 2.529 | -     | -     | 1.060   |

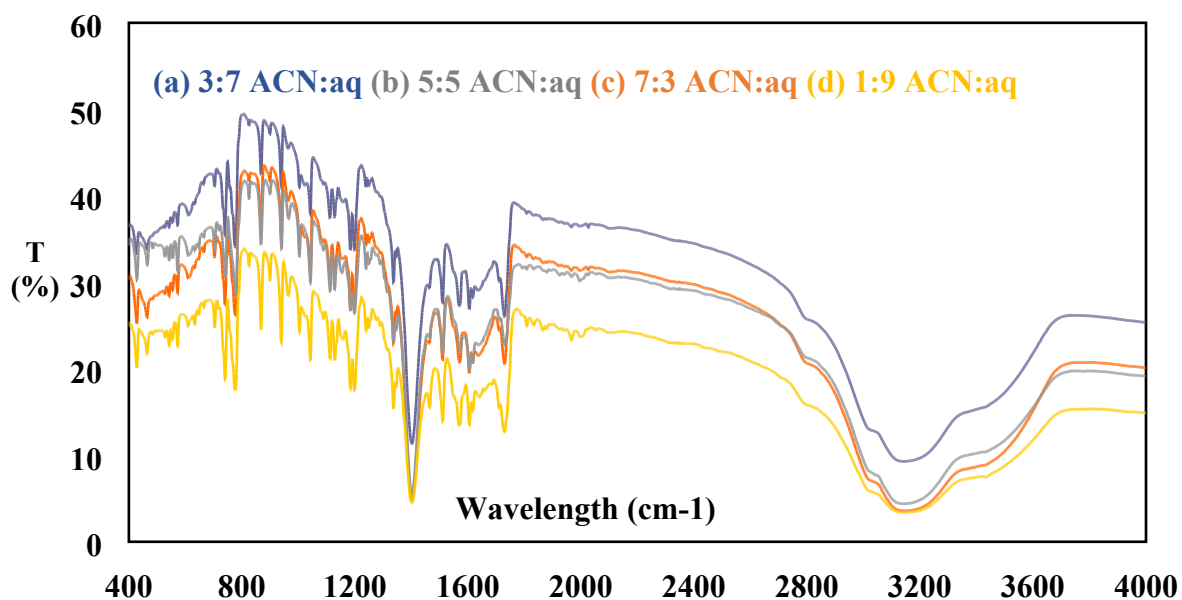

Fig S26 (b). IQ+Fe in (a) 3:7, (b) 5:5, (c) 7:3, and (d) 1:9 of ACN:aq solvent ratios.

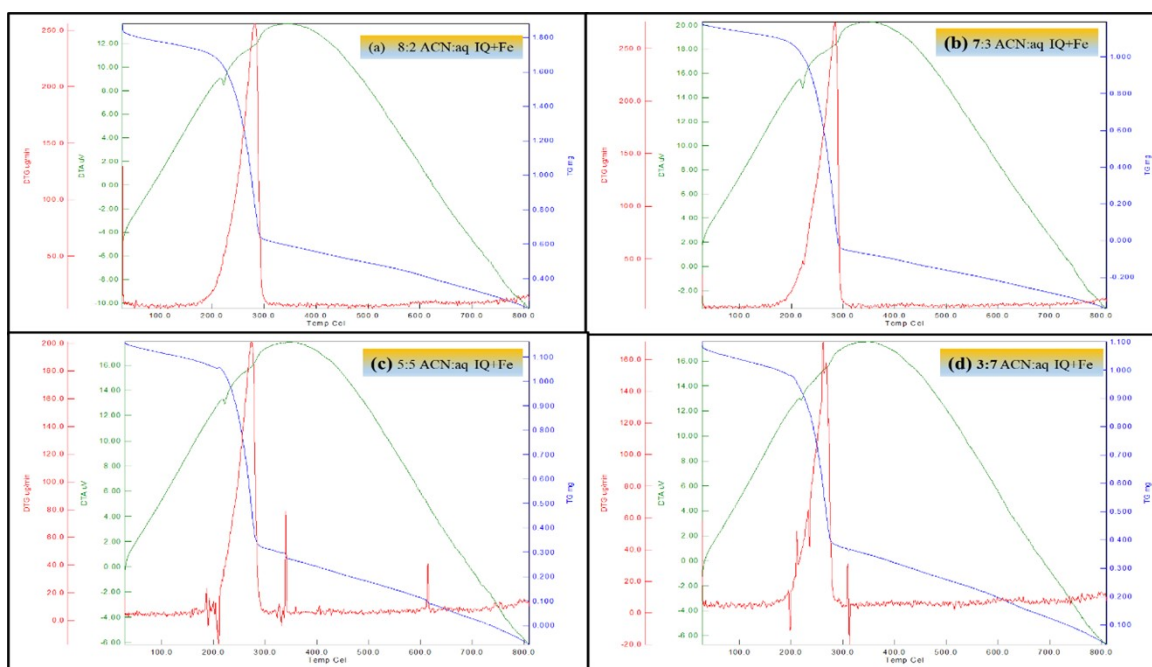

Fig S27. TGA of IQ+Fe in (a) 8:2, (b) 7:3, (c) 5:5, and (d) 3:7 of ACN:aq ratio.

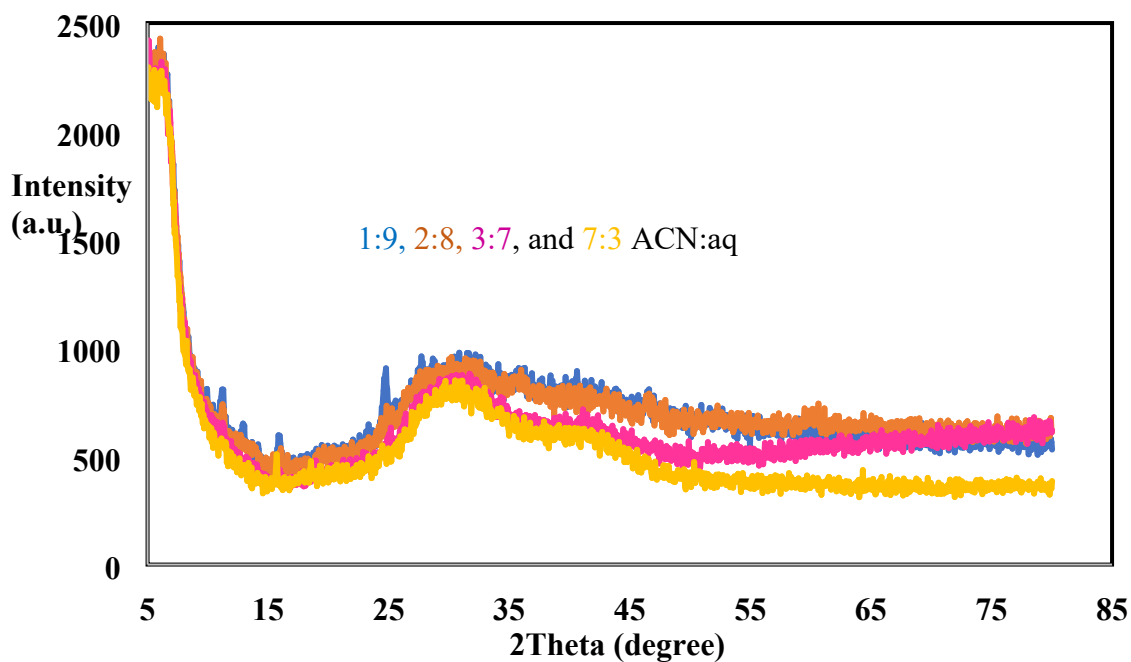

**Fig S28.** XRD spectra of IQ+Fe in different solvent ratio of ACN:aq after 26 days.

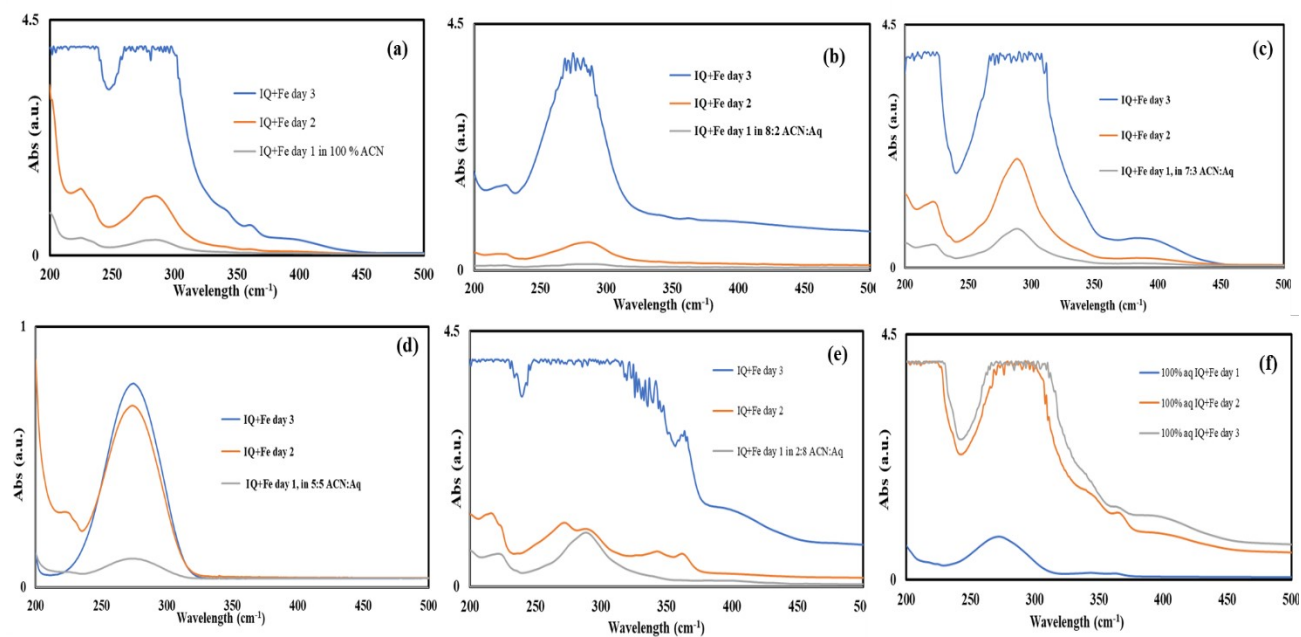

**Fig S29.** UV-Vis of IQ+Fe in (a) ACN, (b) 8:2, (c) 7:3, (d) 5:5, (e) 2:8 of ACN:aq solvent ratio and (f) aq, 1<sup>st</sup>, 2<sup>nd</sup>, and 3<sup>rd</sup> day.



(a) EDX Report

Report No.

| Sample Information |                      |
|--------------------|----------------------|
| Sample Name        | IQ FE 100%           |
| Meas. Date         | 2023/04/06 15:14:39  |
| Comment            | Quick&easy Air-Metal |
| Group              | easy                 |
| Operator           |                      |

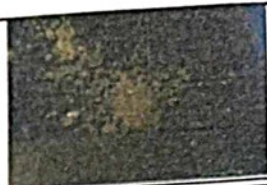

| Measurement Condition |    |              |        | Collimator | 1mm        | Atmos.   | Air |
|-----------------------|----|--------------|--------|------------|------------|----------|-----|
| Channel               | kV | uA           | Filter | Acq.       | Analysis   | Time     | DT% |
| Al-U                  |    | 50 1000-Auto | ---    | 0 - 40     | 0.00-40.00 | Live- 30 | 14  |
| C-Sc                  |    | 15 1000-Auto | ---    | 0 - 20     | 0.00- 4.40 | Live- 30 | 3   |

| Quantitative Result |        |   |          |           |      |           |
|---------------------|--------|---|----------|-----------|------|-----------|
| Analyte             | Result |   | Std.Dev. | Calc.Proc | Line | Intensity |
| Fe                  | 91.493 | % | [ 0.355] | Quan-FP   | FeKa | 20.3206   |
| Si                  | 4.024  | % | [ 1.266] | Quan-FP   | SiKa | 0.0027    |
| Zn                  | 2.265  | % | [ 0.067] | Quan-FP   | ZnKa | 0.3126    |
| Ca                  | 1.316  | % | [ 0.144] | Quan-FP   | CaKa | 0.0226    |
| S                   | 0.650  | % | [ 0.212] | Quan-FP   | S Ka | 0.0061    |
| Mn                  | 0.253  | % | [ 0.026] | Quan-FP   | MnKa | 0.0540    |

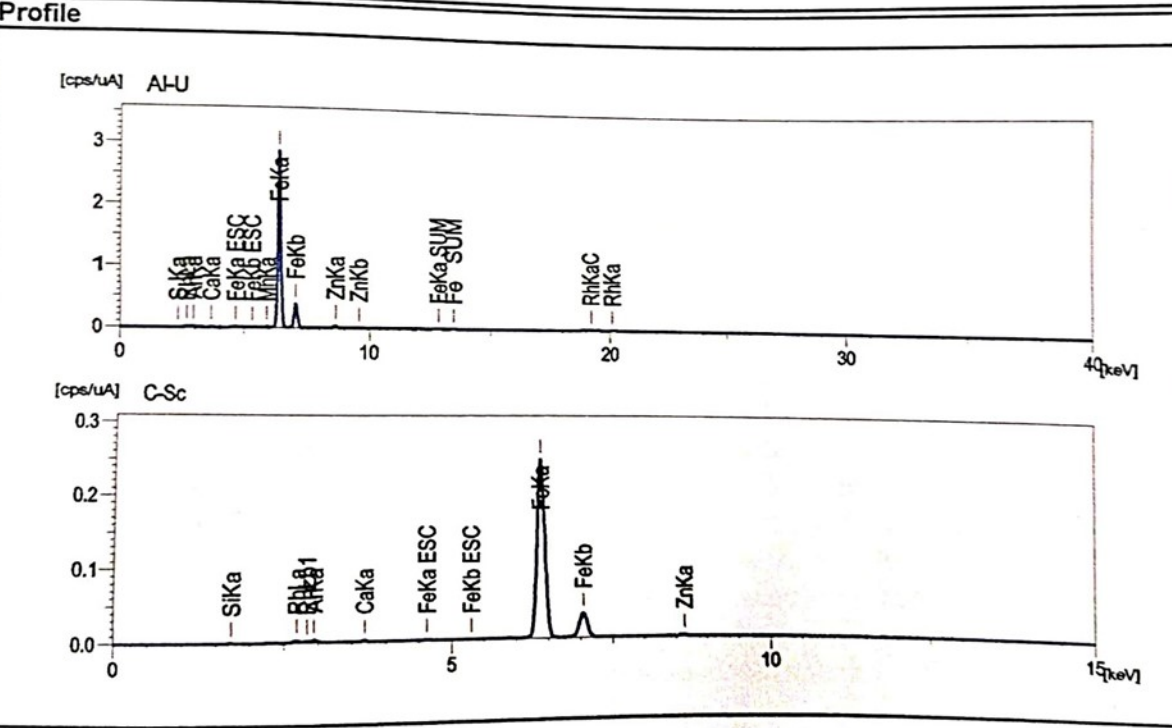

# (b) EDX Report

Report No.

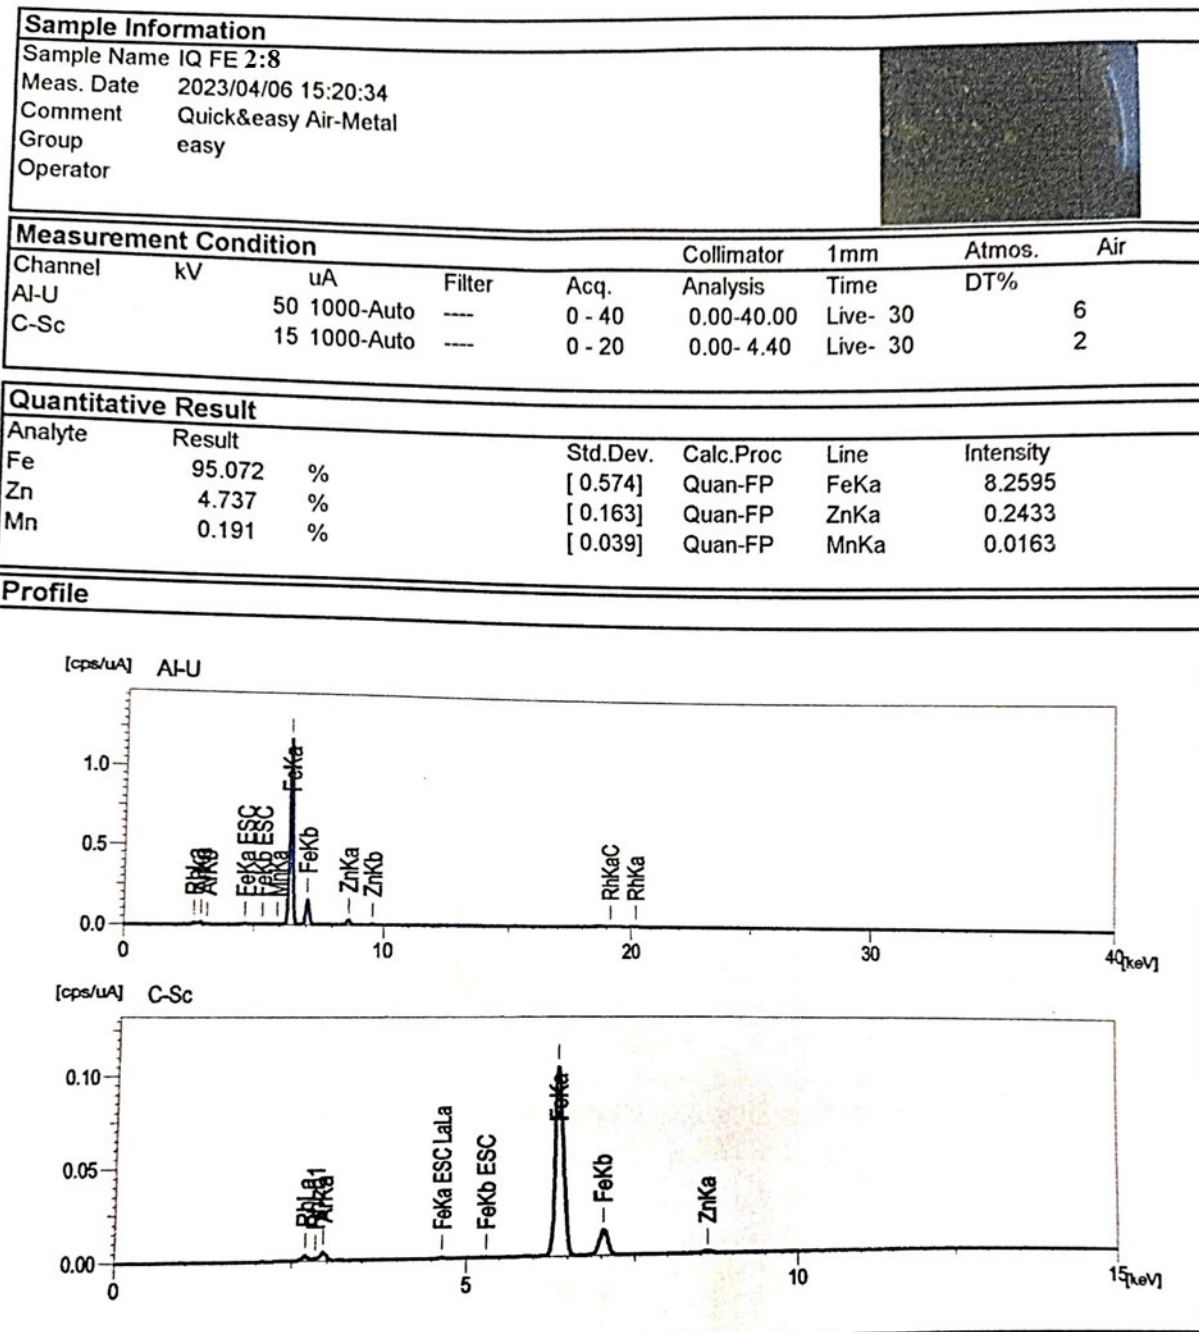

Fig S30. EDX spectra for IQ+Fe in (a) ACN and (b) 2:8 aq:ACN.

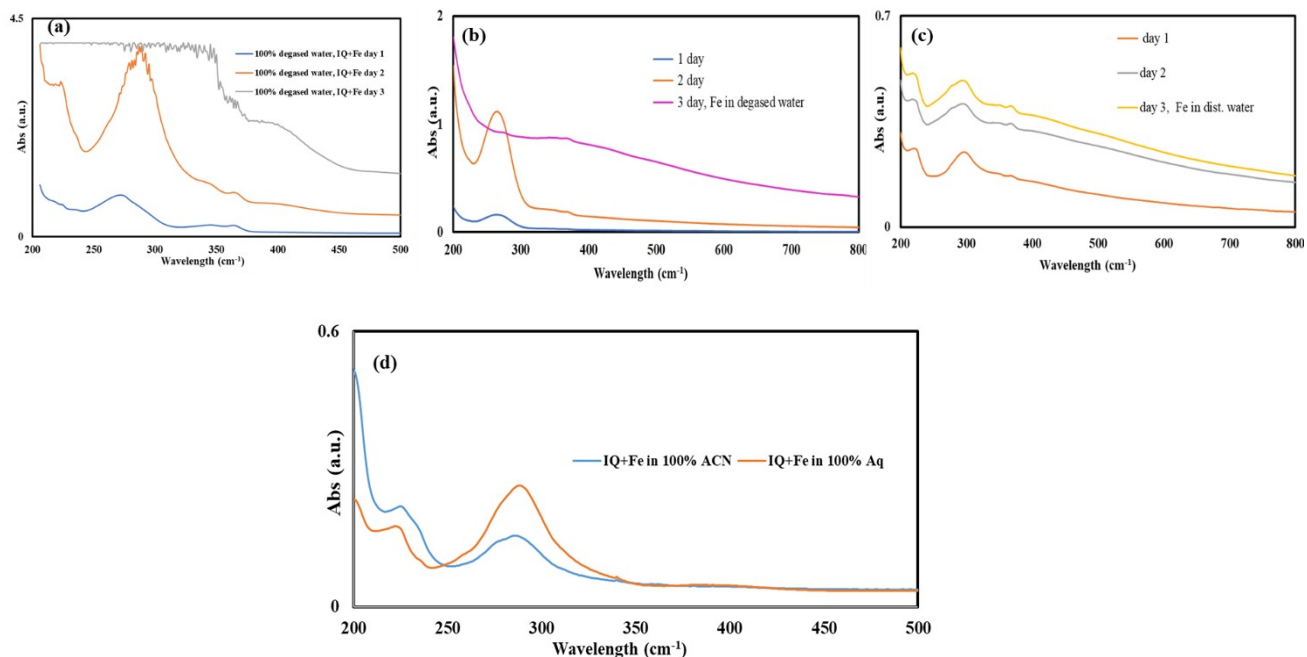

**Fig S31.** UV-Vis spectra for (a) IQ+Fe in degassed water (b) only Fe in degassed and distilled water on 1<sup>st</sup>, 2<sup>nd</sup>, and 3<sup>rd</sup> day (c) only IQ+Fe in distilled water and aq-ACN, and (d) IQ+Fe in ACN and aq.

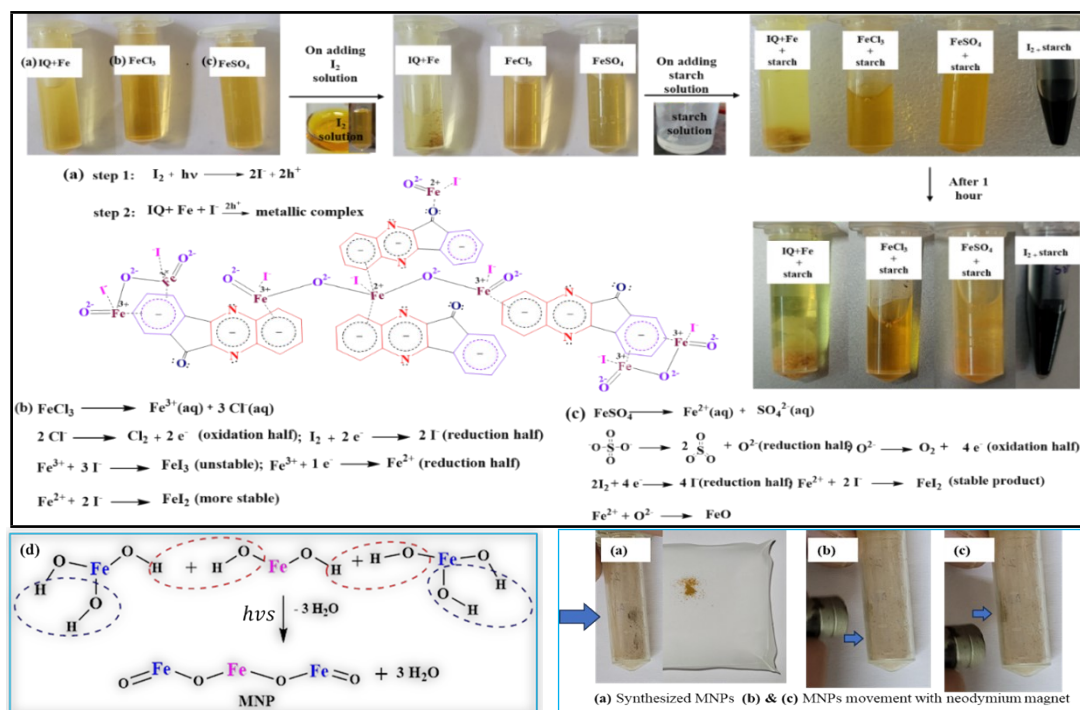

**Fig. S32.** (a) IQ+Fe, (b) aq FeCl<sub>3</sub>, (c) aq FeSO<sub>4</sub> with iodine and starch solutions, and (d) IQ with Fe scrap synthesized MNPs.

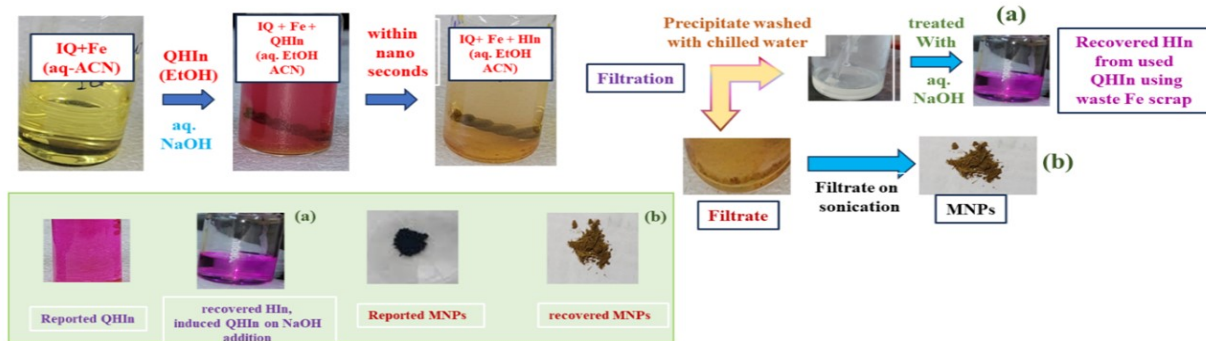

Fig. S33. Recovery of HIn from consumed QHIn by using waste Fe scrap.

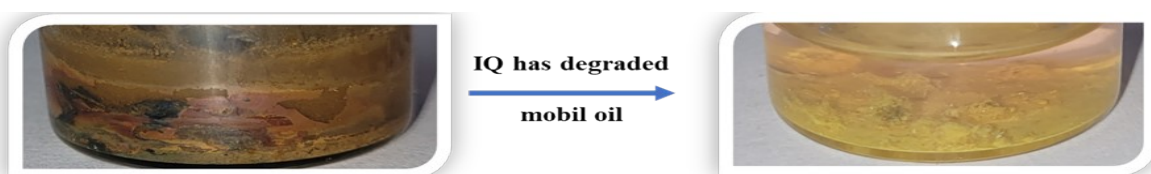

Fig. S34. IQ degraded mobil oil (a) initial and (b) after 15 days.

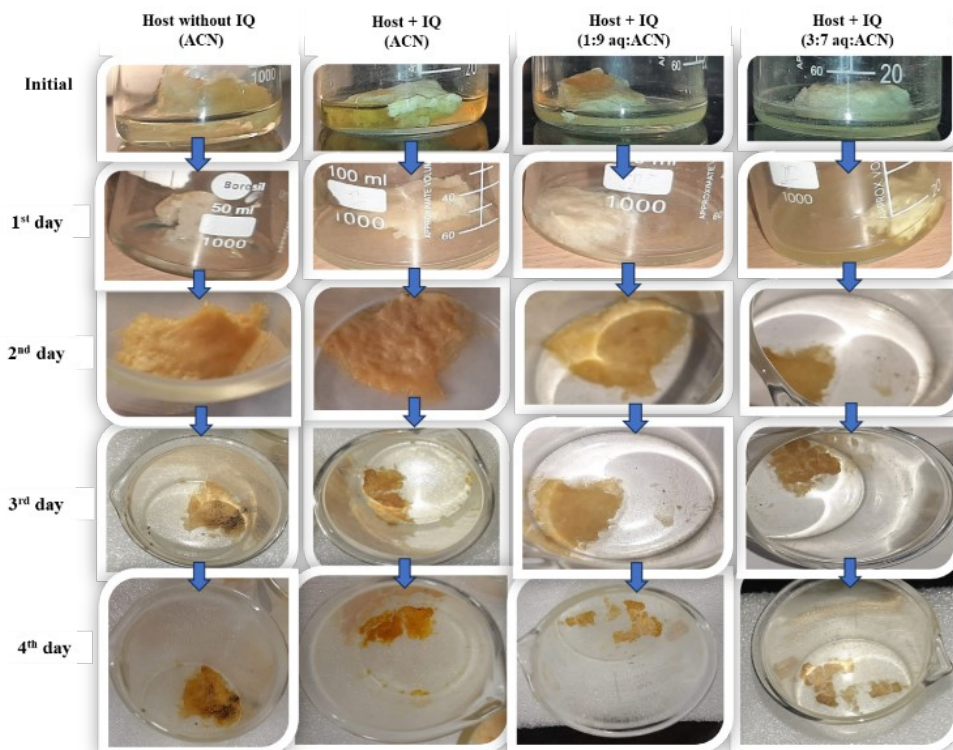

Fig. S35. Antifungal study of IQ with host.



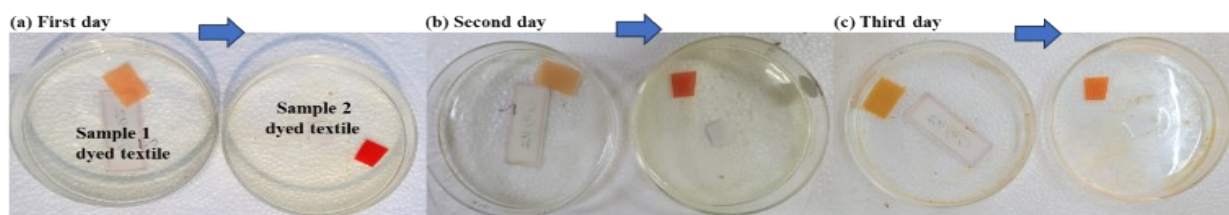

**Fig. S36.** Textile dye detachment using IQ.

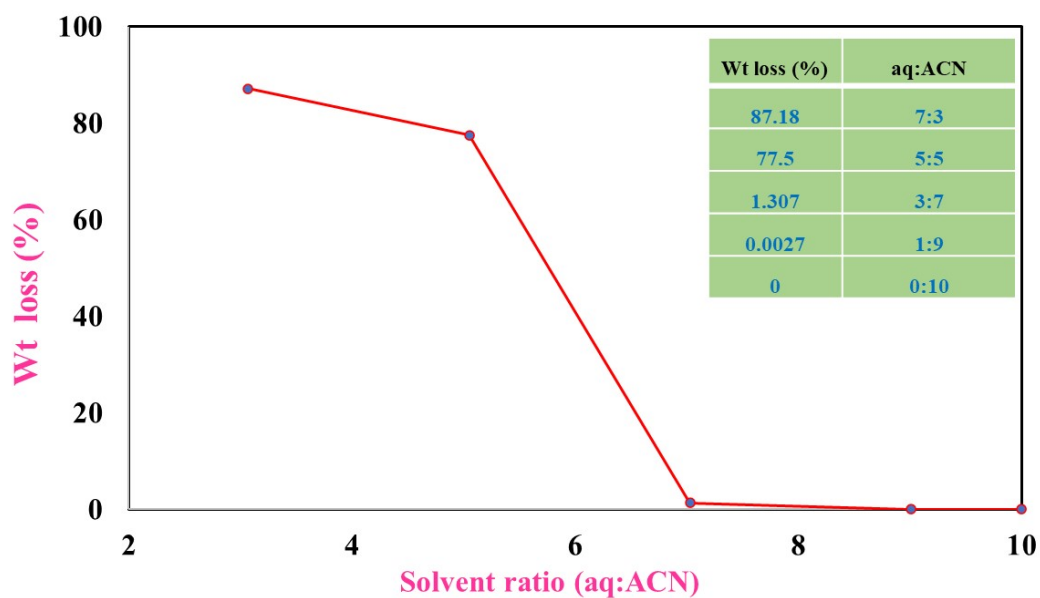

**Chart S1.** Rusting wt loss on varying solvent ratio of aq:ACN.

**Table S8.** IQ+Fe rusting effect in different ratios of aq:ACN.

| Sr. no. | System | aq:ACN ratio | Initial wt of Fe (mg) | Final wt of Fe (mg) | Fe wt loss (%)   |
|---------|--------|--------------|-----------------------|---------------------|------------------|
| 1       | IQ+Fe  | 7:3          | 1207.17               | 1101.92             | 87.18            |
| 2       | IQ+Fe  | 5:5          | 1202.19               | 1109.01             | 77.50            |
| 3       | IQ+Fe  | 3:7          | 1199.07               | 1183.39             | 1.307            |
| 4       | IQ+Fe  | 1:9          | 1466.05               | 1466.01             | 0.0027           |
| 5       | IQ+Fe  | water        | 1320.02               | 1320.02             | ~0( <i>nil</i> ) |

**Table S9.** Elemental analysis of IQ+Fe in ACN, 2:8 aq:ACN, 3:7 aq:ACN, and aq solvent ratios.

| Sr. No. | Type | Name             | N %    | C %    | H %   | S %    | O % |
|---------|------|------------------|--------|--------|-------|--------|-----|
| 1       | Std  | Sulphanilamide   | 16.213 | 44.717 | 8.213 | 20.085 | -   |
| 2       | Std  | Sulphanilamide   | 18.571 | 46.213 | 6.901 | 20.889 | -   |
| 3       | Std  | Sulphanilamide   | 16.320 | 40.632 | 5.121 | 18.151 | -   |
| 4       | Std  | Sulphanilamide   | 15.218 | 38.829 | 4.564 | 16.954 | -   |
| 5       | Std  | Sulphanilamide   | 18.012 | 46.715 | -     | 20.860 | -   |
| 6       | Std  | Sulphanilamide   | 14.341 | 37.238 | 3.524 | 16.471 | -   |
| 7       | Smp  | IQ+Fe in ACN     | 12.149 | 62.313 | 3.395 | 4.334  | -   |
| 8       | Smp  | 2:8 aq:ACN IQ+Fe | 6.406  | 16.957 | 3.934 | -      | -   |
| 9       | Smp  | 3:7 aq:ACN IQ+Fe | 6.877  | 20.495 | 3.946 | -      | -   |
| 10      | Smp  | aq IQ+Fe         | 5.811  | 16.813 | 2.763 | -      | -   |

## References

- [1] R. Kumari and M. Singh, “Photocatalytic reduction of fluorescent dyes in sunlight by newly synthesized spiroindenoquinoxaline pyrrolizidines,” *ACS Omega*, vol. 5, no. 36, pp. 23201–23218, Sep. 2020, doi: 10.1021/acsomega.0c02976.
- [2] R. Kumari and M. Singh, “Spiroheterocyclic Photocatalyst for Reducing QHIn-Persistent Pollutants, Dyes, and Transition-Metal Ions Cocatalyzed with Electrolytes,” *ACS Omega*, vol. 7, no. 44, pp. 40203–40229, doi: 10.1021/acsomega.2c05103.
- [3] N. Kumar, C. Lal, B. Singh, and A. K. Patel, “Synthesis and Biological Activities of Some Novel Spiro Heterocyclic Pyrrolizidine Derivatives of 11H-indeno[1,2-b]quinoxaline through 1,3-Dipolar Cycloaddition,” *Asian Journal of Chemistry*, vol. 32, no. 5, pp. 1255–1258, May 2020, doi: 10.14233/ajchem.2020.22630.
